# Supplementary material for: Biomimetic semiconducting polymer dots for dual targeted NIR-II phototheranostic and multimodal coordinated immunostimulatory therapy
Source: Royal Society of Chemistry journal article supplement (doi:10.1039/d5tb00976f), 2025-01-01
Supplement: d5tb00976f1.xlsx [file d5tb00976f1.xlsx]

## Sheet: Fig. 2b,c
	Abs.(a.u.)						Abs.(a.u.)
Wavelength (nm)	Pdots	CTe	Pdots@CTe			Wavelength (nm)	OPdots@CTe	OCPdots@CTe	Pdots@CTe
250	0.74662	0.78961	0.59714			250	0.75172	0.44189	0.41398
251	0.74081	0.782	0.62206			251	0.74483	0.44054	0.41287
252	0.73501	0.77567	0.63998			252	0.74138	0.43514	0.40844
253	0.72727	0.76933	0.66993			253	0.73448	0.43514	0.40733
254	0.72147	0.76426	0.69541			254	0.72759	0.43108	0.40511
255	0.71373	0.75792	0.72144			255	0.72069	0.43108	0.40289
256	0.70406	0.75032	0.75476			256	0.71379	0.45405	0.41953
257	0.69632	0.74271	0.78052			257	0.7069	0.4473	0.41398
258	0.68859	0.73638	0.79563			258	0.7	0.44054	0.41842
259	0.67892	0.73004	0.83595			259	0.6931	0.44459	0.41953
260	0.67118	0.72243	0.85498			260	0.68276	0.44595	0.42397
261	0.66151	0.71483	0.8659			261	0.67586	0.45	0.41953
262	0.65377	0.70722	0.88718			262	0.66552	0.45135	0.42064
263	0.6441	0.69962	0.9023			263	0.65862	0.44865	0.42175
264	0.63443	0.69075	0.93337			264	0.64828	0.45	0.42064
265	0.62669	0.68314	0.98824			265	0.64138	0.45135	0.42508
266	0.61702	0.67554	0.94373			266	0.63103	0.45676	0.4273
267	0.60928	0.6692	0.92329			267	0.62414	0.45676	0.43063
268	0.60348	0.66413	0.95577			268	0.61724	0.46081	0.43618
269	0.59961	0.66033	0.93981			269	0.61379	0.46351	0.4384
270	0.59381	0.65399	1			270	0.6069	0.46622	0.44173
271	0.58607	0.64766	0.90622			271	0.59655	0.47027	0.44506
272	0.58221	0.64132	0.88942			272	0.5931	0.47432	0.44839
273	0.57834	0.63625	0.87598			273	0.58966	0.47703	0.45283
274	0.57447	0.63245	0.82895			274	0.58621	0.47973	0.45616
275	0.57253	0.62864	0.83147			275	0.58276	0.48243	0.46171
276	0.5706	0.62484	0.79507			276	0.57586	0.48784	0.46504
277	0.56673	0.62104	0.76148			277	0.57241	0.49324	0.46837
278	0.5648	0.61597	0.74272			278	0.56897	0.4973	0.47503
279	0.56093	0.6109	0.71417			279	0.56552	0.5027	0.47836
280	0.55899	0.6071	0.70213			280	0.56207	0.50405	0.4828
281	0.55706	0.60203	0.67049			281	0.55862	0.50676	0.48724
282	0.55319	0.59696	0.64054			282	0.55517	0.51216	0.49057
283	0.55126	0.59316	0.60582			283	0.54828	0.51622	0.49168
284	0.54739	0.58682	0.56383			284	0.54483	0.51757	0.49612
285	0.54352	0.57921	0.5182			285	0.54138	0.52162	0.49834
286	0.54159	0.57288	0.47508			286	0.53793	0.52027	0.49945
287	0.53578	0.56401	0.43645			287	0.53103	0.52162	0.50055
288	0.53191	0.5564	0.40118			288	0.52759	0.52027	0.49945
289	0.52998	0.55006	0.37402			289	0.52069	0.51892	0.49945
290	0.52611	0.54499	0.35134			290	0.51724	0.51757	0.49834
291	0.52224	0.53992	0.33483			291	0.51379	0.51486	0.4939
292	0.51838	0.53485	0.32335			292	0.5069	0.51216	0.49279
293	0.51451	0.52978	0.31579			293	0.50345	0.51081	0.49168
294	0.51064	0.52598	0.31243			294	0.5	0.50676	0.48835
295	0.4913	0.49683	0.24188			295	0.48621	0.50541	0.48613
296	0.46615	0.46641	0.16769			296	0.45172	0.5027	0.4828
297	0.46422	0.46008	0.17245			297	0.45172	0.50135	0.48169
298	0.45841	0.45881	0.17861			298	0.45172	0.5	0.48058
299	0.45261	0.45754	0.18477			299	0.44138	0.49865	0.47836
300	0.45455	0.45754	0.19317			300	0.44483	0.4973	0.47836
301	0.44874	0.45627	0.20017			301	0.43793	0.4973	0.47725
302	0.44874	0.45374	0.20745			302	0.43448	0.49595	0.47725
303	0.44487	0.44994	0.21473			303	0.43448	0.4973	0.47836
304	0.44294	0.45247	0.2206			304	0.43103	0.49595	0.47836
305	0.44487	0.44994	0.22732			305	0.43103	0.4973	0.47836
306	0.45841	0.46768	0.41825			306	0.43793	0.4973	0.47947
307	0.45648	0.47275	0.45269			307	0.44828	0.49865	0.48058
308	0.45841	0.47148	0.48096			308	0.43793	0.5	0.48391
309	0.45841	0.46768	0.48432			309	0.44138	0.5	0.48391
310	0.45841	0.46895	0.5			310	0.43448	0.50135	0.48613
311	0.45648	0.47022	0.54031			311	0.44483	0.5027	0.48613
312	0.45648	0.46895	0.56551			312	0.44138	0.50405	0.48724
313	0.46035	0.47275	0.58231			313	0.44828	0.50405	0.48724
314	0.45841	0.47402	0.60134			314	0.44828	0.5027	0.48835
315	0.46228	0.47909	0.58847			315	0.44483	0.5027	0.48724
316	0.46228	0.48035	0.59602			316	0.45517	0.5027	0.48835
317	0.46809	0.48289	0.59518			317	0.45517	0.50405	0.48724
318	0.47389	0.48669	0.60666			318	0.45172	0.5027	0.48724
319	0.47195	0.48923	0.57559			319	0.45862	0.5027	0.48613
320	0.47776	0.49303	0.55683			320	0.46552	0.50135	0.48502
321	0.48162	0.49556	0.53667			321	0.46552	0.5	0.48502
322	0.48743	0.49937	0.5154			322	0.46552	0.49865	0.48391
323	0.4913	0.50063	0.4986			323	0.47241	0.4973	0.48169
324	0.49516	0.50317	0.4734			324	0.47586	0.49459	0.48058
325	0.4971	0.50697	0.45745			325	0.48276	0.49324	0.47836
326	0.5029	0.51458	0.43981			326	0.48276	0.49189	0.47725
327	0.5087	0.51838	0.42385			327	0.48966	0.48919	0.47503
328	0.51451	0.52218	0.41041			328	0.49655	0.48649	0.47281
329	0.51838	0.52471	0.4023			329	0.49655	0.48378	0.47059
330	0.52031	0.52852	0.3911			330	0.5	0.48243	0.46837
331	0.52611	0.53232	0.38914			331	0.50345	0.47973	0.46726
332	0.52998	0.53739	0.3841			332	0.5069	0.47703	0.46393
333	0.53385	0.54119	0.38774			333	0.5069	0.47568	0.46171
334	0.53578	0.54373	0.38998			334	0.51034	0.47162	0.45949
335	0.53772	0.54626	0.3925			335	0.51034	0.47027	0.45616
336	0.53772	0.54753	0.39754			336	0.51379	0.46757	0.45394
337	0.53965	0.5488	0.40342			337	0.51379	0.46351	0.45061
338	0.53965	0.54753	0.4051			338	0.51724	0.46216	0.44839
339	0.54159	0.5488	0.40566			339	0.51724	0.45811	0.44617
340	0.54352	0.5488	0.4037			340	0.51724	0.45541	0.44284
341	0.53578	0.54373	0.39754			341	0.51034	0.4527	0.43951
342	0.53385	0.54119	0.38774			342	0.5069	0.45	0.43729
343	0.53191	0.53739	0.37374			343	0.50345	0.44595	0.43396
344	0.52805	0.53485	0.3547			344	0.50345	0.44324	0.43063
345	0.52611	0.53105	0.33203			345	0.5	0.43919	0.4273
346	0.52224	0.52852	0.30963			346	0.5	0.43649	0.42397
347	0.52031	0.52598	0.28499			347	0.49655	0.43243	0.42064
348	0.51838	0.52345	0.26008			348	0.49655	0.42838	0.4162
349	0.51644	0.51965	0.23488			349	0.49655	0.42432	0.41287
350	0.51644	0.51838	0.21277			350	0.4931	0.42027	0.40844
351	0.51644	0.51838	0.19233			351	0.4931	0.41622	0.404
352	0.51451	0.51584	0.17385			352	0.4931	0.41081	0.39956
353	0.51451	0.51584	0.15817			353	0.4931	0.40676	0.39401
354	0.51451	0.51711	0.14474			354	0.4931	0.40135	0.38957
355	0.51644	0.51584	0.1327			355	0.4931	0.39595	0.38402
356	0.51838	0.51711	0.12318			356	0.49655	0.39054	0.37847
357	0.51838	0.51711	0.11506			357	0.49655	0.38514	0.37403
358	0.51838	0.51965	0.10834			358	0.49655	0.37973	0.36848
359	0.52031	0.51965	0.1033			359	0.5	0.37432	0.36182
360	0.52031	0.52091	0.09966			360	0.5	0.36757	0.35627
361	0.52224	0.52091	0.09658			361	0.5	0.36216	0.35072
362	0.52224	0.52218	0.09462			362	0.50345	0.35676	0.34517
363	0.52418	0.52345	0.09351			363	0.5069	0.35135	0.33962
364	0.52418	0.52218	0.09295			364	0.50345	0.34595	0.33518
365	0.52418	0.52345	0.09295			365	0.5	0.34189	0.33074
366	0.52418	0.52345	0.09351			366	0.5	0.33784	0.32519
367	0.52418	0.52345	0.09434			367	0.50345	0.33243	0.32075
368	0.52418	0.52218	0.09546			368	0.5	0.32838	0.31632
369	0.52224	0.52091	0.09686			369	0.5	0.32432	0.31299
370	0.52224	0.52091	0.09826			370	0.5	0.32027	0.30966
371	0.52224	0.51965	0.10022			371	0.49655	0.31757	0.30633
372	0.52031	0.51838	0.10218			372	0.49655	0.31486	0.303
373	0.52031	0.51838	0.10414			373	0.4931	0.31081	0.29967
374	0.51838	0.51584	0.1061			374	0.4931	0.30946	0.29745
375	0.51644	0.51458	0.10834			375	0.48966	0.30676	0.29523
376	0.51451	0.51331	0.11058			376	0.48966	0.30405	0.29301
377	0.51257	0.51077	0.11254			377	0.48621	0.3027	0.29079
378	0.5087	0.50824	0.11478			378	0.48621	0.30135	0.28968
379	0.50677	0.50697	0.11702			379	0.48276	0.29865	0.28857
380	0.50484	0.50444	0.11898			380	0.47931	0.2973	0.28746
381	0.5029	0.5019	0.12094			381	0.47586	0.2973	0.28635
382	0.50097	0.49937	0.1229			382	0.47241	0.29595	0.28524
383	0.4971	0.4981	0.12486			383	0.47241	0.29459	0.28413
384	0.49516	0.49556	0.12654			384	0.46897	0.29459	0.28413
385	0.49323	0.49303	0.12822			385	0.46552	0.29459	0.28413
386	0.48936	0.49049	0.12962			386	0.46207	0.29459	0.28413
387	0.48743	0.48796	0.1313			387	0.46207	0.29459	0.28524
388	0.48356	0.48542	0.1327			388	0.45862	0.29459	0.28524
389	0.48162	0.48162	0.1341			389	0.45517	0.29595	0.28524
390	0.47776	0.47909	0.13522			390	0.45172	0.29595	0.28635
391	0.47582	0.47655	0.13634			391	0.44828	0.2973	0.28746
392	0.47195	0.47275	0.13718			392	0.44483	0.2973	0.28857
393	0.47002	0.47022	0.13802			393	0.44138	0.29865	0.28857
394	0.46615	0.46641	0.13886			394	0.43793	0.29865	0.28968
395	0.46228	0.46261	0.1397			395	0.43448	0.3	0.29079
396	0.45841	0.46008	0.14026			396	0.43103	0.3	0.29079
397	0.45455	0.45627	0.14082			397	0.42759	0.30135	0.2919
398	0.45068	0.45247	0.14138			398	0.42414	0.30135	0.2919
399	0.44681	0.44867	0.14194			399	0.41724	0.3	0.2919
400	0.44294	0.4436	0.14222			400	0.41379	0.30135	0.2919
401	0.43714	0.4398	0.1425			401	0.41034	0.3	0.2919
402	0.43327	0.43473	0.1425			402	0.40345	0.3	0.29079
403	0.42747	0.42966	0.1425			403	0.4	0.3	0.29079
404	0.42166	0.42459	0.1425			404	0.39655	0.29865	0.28968
405	0.41586	0.41825	0.1425			405	0.38966	0.29865	0.28968
406	0.41006	0.41318	0.1425			406	0.38276	0.2973	0.28968
407	0.40426	0.40684	0.14222			407	0.37931	0.2973	0.28857
408	0.39845	0.40051	0.14222			408	0.37241	0.2973	0.28857
409	0.39265	0.39544	0.14194			409	0.36552	0.2973	0.28857
410	0.38491	0.3891	0.14166			410	0.36207	0.2973	0.28857
411	0.38104	0.38276	0.14138			411	0.35517	0.2973	0.28968
412	0.37331	0.37769	0.14082			412	0.35172	0.29865	0.29079
413	0.36944	0.37136	0.14054			413	0.34483	0.3	0.2919
414	0.36364	0.36629	0.13998			414	0.33793	0.30135	0.29301
415	0.35783	0.36122	0.1397			415	0.33448	0.3027	0.29523
416	0.35203	0.35615	0.13914			416	0.33103	0.30541	0.29745
417	0.34816	0.35108	0.1383			417	0.32414	0.30676	0.29967
418	0.34236	0.34601	0.13802			418	0.32069	0.30946	0.30189
419	0.33849	0.34221	0.13746			419	0.31724	0.31216	0.30411
420	0.33462	0.3384	0.1369			420	0.31379	0.31351	0.30633
421	0.33075	0.3346	0.13634			421	0.31034	0.31622	0.30855
422	0.32689	0.33207	0.13578			422	0.3069	0.31757	0.31077
423	0.32495	0.32826	0.13522			423	0.3069	0.31892	0.31188
424	0.32108	0.32573	0.13466			424	0.30345	0.32027	0.31299
425	0.31915	0.32319	0.1341			425	0.3	0.31892	0.31299
426	0.31721	0.32066	0.13354			426	0.3	0.31892	0.31188
427	0.31528	0.31812	0.13298			427	0.29655	0.31622	0.30966
428	0.31335	0.31686	0.13214			428	0.2931	0.31351	0.30744
429	0.31141	0.31432	0.13158			429	0.2931	0.30946	0.303
430	0.30948	0.31305	0.13074			430	0.2931	0.30405	0.29745
431	0.30754	0.31179	0.13018			431	0.28966	0.2973	0.29079
432	0.30754	0.31179	0.12934			432	0.28966	0.29054	0.28413
433	0.30561	0.31052	0.1285			433	0.28966	0.28243	0.27636
434	0.30561	0.31052	0.12766			434	0.28966	0.27432	0.26748
435	0.30561	0.30925	0.12682			435	0.28966	0.26486	0.2586
436	0.30561	0.30925	0.12598			436	0.28966	0.25541	0.24972
437	0.30561	0.30925	0.12486			437	0.28966	0.24595	0.24084
438	0.30561	0.31052	0.12374			438	0.28966	0.23649	0.23085
439	0.30561	0.31052	0.12262			439	0.28966	0.22703	0.22087
440	0.30754	0.31052	0.12122			440	0.28966	0.21757	0.21088
441	0.30754	0.31179	0.1201			441	0.28966	0.20811	0.20089
442	0.30754	0.31179	0.1187			442	0.2931	0.2	0.19312
443	0.30948	0.31305	0.11702			443	0.2931	0.19189	0.18535
444	0.30948	0.31305	0.11562			444	0.2931	0.18378	0.17758
445	0.31141	0.31432	0.11394			445	0.2931	0.17703	0.16981
446	0.31141	0.31432	0.11198			446	0.29655	0.17027	0.16315
447	0.31141	0.31432	0.11002			447	0.29655	0.16351	0.15649
448	0.31141	0.31559	0.10806			448	0.29655	0.15811	0.15094
449	0.31141	0.31432	0.10582			449	0.29655	0.1527	0.14539
450	0.31141	0.31432	0.10386			450	0.29655	0.1473	0.14095
451	0.31141	0.31432	0.10134			451	0.29655	0.14324	0.13651
452	0.31141	0.31305	0.09882			452	0.29655	0.13919	0.13319
453	0.31141	0.31305	0.0963			453	0.2931	0.13514	0.12875
454	0.30948	0.31179	0.09378			454	0.2931	0.13243	0.12542
455	0.30948	0.31179	0.09099			455	0.2931	0.12973	0.1232
456	0.30948	0.31052	0.08847			456	0.2931	0.12703	0.11987
457	0.30948	0.31052	0.08539			457	0.2931	0.12432	0.11765
458	0.30754	0.31052	0.08259			458	0.2931	0.12162	0.11543
459	0.30754	0.31052	0.07951			459	0.2931	0.12027	0.11321
460	0.30754	0.31052	0.07643			460	0.2931	0.11892	0.1121
461	0.30948	0.31052	0.07335			461	0.2931	0.11622	0.10988
462	0.30948	0.31179	0.07055			462	0.2931	0.11486	0.10877
463	0.31141	0.31179	0.06747			463	0.2931	0.11351	0.10766
464	0.31141	0.31305	0.06467			464	0.29655	0.11351	0.10655
465	0.31335	0.31559	0.06159			465	0.29655	0.11216	0.10544
466	0.31528	0.31686	0.05851			466	0.3	0.11081	0.10544
467	0.31721	0.31939	0.05543			467	0.3	0.11081	0.10433
468	0.32108	0.32193	0.05263			468	0.30345	0.10946	0.10433
469	0.32302	0.32319	0.04983			469	0.3069	0.10946	0.10322
470	0.32495	0.32573	0.04731			470	0.3069	0.10946	0.10322
471	0.32689	0.327	0.04451			471	0.31034	0.10946	0.10322
472	0.32882	0.32953	0.04199			472	0.31034	0.10946	0.10322
473	0.33075	0.32953	0.03919			473	0.31379	0.10811	0.10322
474	0.33075	0.3308	0.03695			474	0.31379	0.10811	0.10322
475	0.33075	0.32953	0.03443			475	0.31379	0.10811	0.10322
476	0.32882	0.32826	0.03247			476	0.31379	0.10946	0.10322
477	0.32689	0.32573	0.03024			477	0.31034	0.10946	0.10322
478	0.32495	0.32319	0.02828			478	0.3069	0.10946	0.10322
479	0.31915	0.31812	0.02632			479	0.30345	0.10946	0.10433
480	0.31335	0.31179	0.02436			480	0.29655	0.10946	0.10433
481	0.30754	0.30545	0.02268			481	0.28966	0.10946	0.10433
482	0.29981	0.29785	0.021			482	0.28276	0.11081	0.10544
483	0.29207	0.29024	0.0196			483	0.27586	0.11081	0.10544
484	0.2824	0.28137	0.0182			484	0.26897	0.11081	0.10655
485	0.27466	0.2725	0.0168			485	0.25862	0.11216	0.10655
486	0.26499	0.26236	0.01568			486	0.24828	0.11216	0.10766
487	0.25338	0.25222	0.01456			487	0.24138	0.11351	0.10877
488	0.24371	0.24208	0.01344			488	0.23103	0.11351	0.10877
489	0.23404	0.23321	0.01232			489	0.22069	0.11486	0.10988
490	0.22437	0.22307	0.0112			490	0.21034	0.11486	0.10988
491	0.2147	0.21293	0.01036			491	0.2	0.11622	0.11099
492	0.20503	0.20406	0.0098			492	0.1931	0.11622	0.1121
493	0.19729	0.19645	0.00896			493	0.18276	0.11757	0.1121
494	0.18956	0.18758	0.00812			494	0.17586	0.11757	0.11321
495	0.18182	0.17997	0.00756			495	0.16897	0.11892	0.11432
496	0.17408	0.17364	0.007			496	0.16207	0.11892	0.11432
497	0.16828	0.1673	0.00644			497	0.15517	0.12027	0.11543
498	0.16248	0.16223	0.00588			498	0.15172	0.12162	0.11654
499	0.15667	0.15589	0.00532			499	0.14483	0.12162	0.11765
500	0.15087	0.15082	0.00504			500	0.14138	0.12297	0.11876
501	0.14507	0.14575	0.00448			501	0.13448	0.12432	0.11987
502	0.1412	0.14195	0.0042			502	0.13103	0.12432	0.12098
503	0.13733	0.13815	0.00392			503	0.12759	0.12568	0.12098
504	0.13346	0.13435	0.00364			504	0.12414	0.12568	0.12209
505	0.13153	0.13181	0.00336			505	0.12414	0.12703	0.1232
506	0.12766	0.12928	0.00308			506	0.12069	0.12838	0.12431
507	0.12573	0.12674	0.0028			507	0.11724	0.12973	0.12542
508	0.12379	0.12421	0.00252			508	0.11379	0.12973	0.12653
509	0.12186	0.12294	0.00252			509	0.11379	0.13108	0.12764
510	0.11992	0.12041	0.00224			510	0.11034	0.13243	0.12875
511	0.11799	0.11914	0.00196			511	0.11034	0.13378	0.12986
512	0.11605	0.11787	0.00196			512	0.11034	0.13378	0.13097
513	0.11605	0.1166	0.00168			513	0.1069	0.13514	0.13208
514	0.11412	0.11534	0.00168			514	0.1069	0.13649	0.13319
515	0.11412	0.11407	0.0014			515	0.1069	0.13784	0.1343
516	0.11219	0.11407	0.0014			516	0.1069	0.13784	0.13541
517	0.11219	0.1128	0.0014			517	0.10345	0.13919	0.13651
518	0.11219	0.1128	0.00112			518	0.10345	0.14054	0.13762
519	0.11025	0.11153	0.00112			519	0.10345	0.14189	0.13873
520	0.11025	0.11153	0.00112			520	0.10345	0.14324	0.13984
521	0.11025	0.11153	0.00112			521	0.10345	0.14324	0.14095
522	0.11025	0.11153	0.000839866			522	0.10345	0.14459	0.14206
523	0.11025	0.11153	0.000839866			523	0.10345	0.14595	0.14317
524	0.11025	0.11153	0.000839866			524	0.10345	0.1473	0.14428
525	0.11025	0.11153	0.000839866			525	0.10345	0.14865	0.14539
526	0.11025	0.11153	0.000839866			526	0.10345	0.15	0.1465
527	0.11025	0.11153	0.000839866			527	0.10345	0.15	0.14761
528	0.11025	0.11153	0.00055991			528	0.10345	0.15135	0.14872
529	0.11219	0.1128	0.00055991			529	0.10345	0.1527	0.14983
530	0.11219	0.1128	0.00055991			530	0.10345	0.15405	0.15094
531	0.11219	0.1128	0.00055991			531	0.1069	0.15541	0.15316
532	0.11219	0.11407	0.00055991			532	0.1069	0.15676	0.15427
533	0.11219	0.11407	0.00055991			533	0.1069	0.15811	0.15538
534	0.11412	0.11534	0.00055991			534	0.1069	0.15946	0.15649
535	0.11412	0.11534	0.00055991			535	0.1069	0.16081	0.1576
536	0.11412	0.1166	0.00055991			536	0.1069	0.16216	0.15871
537	0.11605	0.1166	0.00055991			537	0.11034	0.16351	0.16093
538	0.11605	0.11787	0.00055991			538	0.11034	0.16486	0.16204
539	0.11799	0.11787	0.00055991			539	0.11034	0.16622	0.16426
540	0.11799	0.11914	0.00055991			540	0.11034	0.16757	0.16537
541	0.11799	0.11914	0.00055991			541	0.11034	0.16892	0.16648
542	0.11992	0.12041	0.00055991			542	0.11379	0.17027	0.1687
543	0.11992	0.12167	0.00055991			543	0.11379	0.17162	0.16981
544	0.12186	0.12167	0.00055991			544	0.11379	0.17432	0.17092
545	0.12186	0.12294	0.000279955			545	0.11379	0.17568	0.17314
546	0.12379	0.12421	0.000279955			546	0.11724	0.17703	0.17425
547	0.12379	0.12421	0.000279955			547	0.11724	0.17838	0.17647
548	0.12573	0.12548	0.000279955			548	0.11724	0.17973	0.17758
549	0.12573	0.12674	0.000279955			549	0.11724	0.18108	0.1798
550	0.12766	0.12801	0.000279955			550	0.12069	0.18243	0.18091
551	0.12766	0.12801	0.000279955			551	0.12069	0.18378	0.18202
552	0.12959	0.12928	0.000279955			552	0.12069	0.18514	0.18424
553	0.12959	0.13054	0.000279955			553	0.12069	0.18649	0.18535
554	0.13153	0.13181	0.000279955			554	0.12414	0.18784	0.18646
555	0.13153	0.13308	0.000279955			555	0.12414	0.18919	0.18757
556	0.13346	0.13435	0.000279955			556	0.12414	0.19054	0.18868
557	0.1354	0.13561	0.000279955			557	0.12759	0.19189	0.18979
558	0.1354	0.13561	0.000279955			558	0.12759	0.19324	0.1909
559	0.13733	0.13688	0.000279955			559	0.12759	0.19324	0.19201
560	0.13733	0.13815	0.000279955			560	0.13103	0.19459	0.19201
561	0.13926	0.13942	0.000279955			561	0.13103	0.19459	0.19312
562	0.13926	0.14068	0.000279955			562	0.13103	0.19595	0.19423
563	0.1412	0.14195	0.000279955			563	0.13103	0.19595	0.19423
564	0.14313	0.14322	0.000279955			564	0.13448	0.19595	0.19423
565	0.14313	0.14449	0.000279955			565	0.13448	0.19595	0.19423
566	0.14507	0.14449	0.000279955			566	0.13448	0.19595	0.19423
567	0.14507	0.14575	0.000279955			567	0.13793	0.19595	0.19423
568	0.147	0.14702	0.000279955			568	0.13793	0.19595	0.19423
569	0.14894	0.14829	0.000279955			569	0.13793	0.19459	0.19423
570	0.14894	0.14956	0.000279955			570	0.14138	0.19459	0.19312
571	0.15087	0.15082	0.000279955			571	0.14138	0.19459	0.19312
572	0.1528	0.15209	0.000279955			572	0.14138	0.19324	0.19201
573	0.1528	0.15336	0.000279955			573	0.14483	0.19189	0.1909
574	0.15474	0.15463	0.000279955			574	0.14483	0.19189	0.18979
575	0.15667	0.15589	0.000279955			575	0.14483	0.19054	0.18979
576	0.15667	0.15716	0.000279955			576	0.14828	0.18919	0.18868
577	0.15861	0.15843	0.000279955			577	0.14828	0.18784	0.18757
578	0.16054	0.1597	0.000279955			578	0.14828	0.18784	0.18646
579	0.16054	0.16096	0.000279955			579	0.15172	0.18649	0.18424
580	0.16248	0.16223	0.000279955			580	0.15172	0.18514	0.18313
581	0.16441	0.1635	0.000279955			581	0.15517	0.18378	0.18202
582	0.16441	0.16477	0.000279955			582	0.15517	0.18243	0.18091
583	0.16634	0.16603	0.000279955			583	0.15517	0.18108	0.1798
584	0.16828	0.1673	0.000279955			584	0.15862	0.18108	0.17869
585	0.17021	0.16857	0.000279955			585	0.15862	0.17973	0.17758
586	0.17021	0.16984	0.000279955			586	0.15862	0.17838	0.17647
587	0.17215	0.17237	0.000279955			587	0.16207	0.17703	0.17536
588	0.17408	0.17364	0.000279955			588	0.16207	0.17568	0.17536
589	0.17602	0.1749	0.000279955			589	0.16552	0.17568	0.17425
590	0.17795	0.17617	0.000279955			590	0.16552	0.17432	0.17314
591	0.17795	0.17871	0.000279955			591	0.16897	0.17297	0.17203
592	0.17988	0.17997	0.000279955			592	0.16897	0.17297	0.17092
593	0.18182	0.18124	0.000279955			593	0.17241	0.17162	0.17092
594	0.18375	0.18251	0.000279955			594	0.17241	0.17162	0.16981
595	0.18569	0.18504	0.000279955			595	0.17241	0.17162	0.16981
596	0.18762	0.18631	0.000279955			596	0.17586	0.17027	0.1687
597	0.18762	0.18758	0.000279955			597	0.17586	0.17027	0.1687
598	0.18956	0.18885	0.000279955			598	0.17931	0.17027	0.1687
599	0.19149	0.19138	0.000279955			599	0.17931	0.17027	0.16759
600	0.19342	0.19265	0.000279955			600	0.18276	0.16892	0.16759
601	0.19536	0.19392	0.000279955			601	0.18276	0.16892	0.16759
602	0.19536	0.19518	0.000279955			602	0.18621	0.16892	0.16759
603	0.19729	0.19645	0.000279955			603	0.18621	0.16892	0.16759
604	0.19923	0.19772	0.000279955			604	0.18621	0.16892	0.16759
605	0.19923	0.19899	0.000279955			605	0.18621	0.16892	0.16759
606	0.20116	0.20025	0.000279955			606	0.18966	0.17027	0.16759
607	0.20309	0.20152	0.000279955			607	0.18966	0.17027	0.16759
608	0.20309	0.20279	0.000279955			608	0.18966	0.17027	0.16759
609	0.20503	0.20406	0.000279955			609	0.1931	0.17027	0.1687
610	0.20503	0.20406	0.000279955			610	0.1931	0.17027	0.1687
611	0.20503	0.20532	0.000279955			611	0.1931	0.17027	0.1687
612	0.20696	0.20532	0.000279955			612	0.1931	0.17027	0.16981
613	0.20696	0.20532	0.000279955			613	0.1931	0.17162	0.16981
614	0.20696	0.20659	0.000279955			614	0.1931	0.17162	0.16981
615	0.20696	0.20659	0.000279955			615	0.1931	0.17162	0.17092
616	0.20696	0.20659	0.000279955			616	0.1931	0.17297	0.17092
617	0.20696	0.20659	0.000279955			617	0.1931	0.17297	0.17203
618	0.20696	0.20532	0.000279955			618	0.1931	0.17432	0.17203
619	0.20696	0.20532	0.000279955			619	0.1931	0.17432	0.17314
620	0.20696	0.20532	0.000279955			620	0.1931	0.17432	0.17314
621	0.20503	0.20406	0.000279955			621	0.1931	0.17568	0.17425
622	0.20503	0.20406	0.000279955			622	0.18966	0.17568	0.17425
623	0.20309	0.20279	0.000279955			623	0.18966	0.17703	0.17536
624	0.20309	0.20152	0.000279955			624	0.18966	0.17838	0.17647
625	0.20116	0.20152	0.000279955			625	0.18966	0.17838	0.17647
626	0.20116	0.20025	0.000279955			626	0.18621	0.17973	0.17758
627	0.19923	0.19899	0.000279955			627	0.18621	0.17973	0.17869
628	0.19923	0.19772	0.000279955			628	0.18621	0.18108	0.1798
629	0.19729	0.19645	0.000279955			629	0.18276	0.18108	0.1798
630	0.19729	0.19518	0.000279955			630	0.18276	0.18243	0.18091
631	0.19536	0.19392	0.000279955			631	0.18276	0.18378	0.18202
632	0.19342	0.19265	0.000279955			632	0.17931	0.18378	0.18313
633	0.19342	0.19138	0.000279955			633	0.17931	0.18514	0.18424
634	0.19149	0.19011	0.000279955			634	0.17931	0.18649	0.18535
635	0.19149	0.19011	0.000279955			635	0.17586	0.18784	0.18535
636	0.18956	0.18885	0.000279955			636	0.17586	0.18784	0.18646
637	0.18762	0.18758	0.000279955			637	0.17586	0.18919	0.18757
638	0.18762	0.18631	0.000279955			638	0.17241	0.19054	0.18868
639	0.18569	0.18504	0.000279955			639	0.17241	0.19189	0.18979
640	0.18569	0.18504	0.000279955			640	0.17241	0.19189	0.1909
641	0.18569	0.18378	0.000279955			641	0.17241	0.19324	0.19201
642	0.18375	0.18378	0.000279955			642	0.17241	0.19459	0.19312
643	0.18375	0.18251	0.000279955			643	0.16897	0.19595	0.19423
644	0.18375	0.18251	0.000279955			644	0.16897	0.1973	0.19645
645	0.18182	0.18124	0.000279955			645	0.16897	0.19865	0.19756
646	0.18182	0.18124	0.000279955			646	0.16897	0.2	0.19867
647	0.18182	0.17997	0.000279955			647	0.16897	0.20135	0.19978
648	0.18182	0.17997	0.000279955			648	0.16897	0.2027	0.20089
649	0.18182	0.17997	0.000279955			649	0.16897	0.20405	0.202
650	0.17988	0.17997	0.000279955			650	0.16897	0.20541	0.20422
651	0.17988	0.17997	0.000279955			651	0.16897	0.20676	0.20533
652	0.17988	0.17997	0.000279955			652	0.16897	0.20811	0.20644
653	0.17988	0.17871	0.000279955			653	0.16897	0.20946	0.20866
654	0.17988	0.17871	0.000279955			654	0.16897	0.21081	0.20977
655	0.17988	0.17997	0.000279955			655	0.16897	0.21351	0.21199
656	0.17988	0.17997	0.000279955			656	0.16897	0.21486	0.2131
657	0.17988	0.17997	0.000279955			657	0.16897	0.21622	0.21532
658	0.18182	0.17997	0.000279955			658	0.16897	0.21757	0.21643
659	0.18182	0.17997	0.000279955			659	0.16897	0.21892	0.21865
660	0.18182	0.18124	0.000279955			660	0.16897	0.22162	0.21976
661	0.18182	0.18124	0.000279955			661	0.16897	0.22297	0.22087
662	0.18182	0.18124	0.000279955			662	0.16897	0.22432	0.22309
663	0.18182	0.18251	0.000279955			663	0.16897	0.22568	0.22531
664	0.18375	0.18251	0.000279955			664	0.16897	0.22838	0.22642
665	0.18375	0.18251	0.000279955			665	0.16897	0.22973	0.22863
666	0.18375	0.18378	0.000279955			666	0.17241	0.23108	0.22974
667	0.18569	0.18378	0.000279955			667	0.17241	0.23378	0.23196
668	0.18569	0.18504	0.000279955			668	0.17241	0.23514	0.23418
669	0.18569	0.18504	0.000279955			669	0.17241	0.23649	0.23529
670	0.18762	0.18631	0.000279955			670	0.17241	0.23919	0.23751
671	0.18762	0.18631	0.000279955			671	0.17586	0.24054	0.23862
672	0.18762	0.18758	0.000279955			672	0.17586	0.24189	0.24084
673	0.18956	0.18885	0.000279955			673	0.17586	0.24459	0.24306
674	0.18956	0.18885	0.000279955			674	0.17586	0.24595	0.24528
675	0.19149	0.19011	0.000279955			675	0.17586	0.2473	0.24639
676	0.19149	0.19138	0.000279955			676	0.17931	0.24865	0.24861
677	0.19342	0.19138	0.000279955			677	0.17931	0.25135	0.24972
678	0.19342	0.19265	0.000279955			678	0.17931	0.2527	0.25194
679	0.19536	0.19392	0.000279955			679	0.17931	0.25541	0.25416
680	0.19536	0.19392	0.000279955			680	0.18276	0.25676	0.25527
681	0.19536	0.19518	0.000279955			681	0.18276	0.25811	0.25749
682	0.19729	0.19645	0.000279955			682	0.18276	0.26081	0.25971
683	0.19729	0.19772	0.000279955			683	0.18276	0.26216	0.26082
684	0.19923	0.19899	0.000279955			684	0.18621	0.26351	0.26304
685	0.20116	0.20025	0.000279955			685	0.18621	0.26622	0.26415
686	0.20116	0.20025	0.000279955			686	0.18621	0.26757	0.26637
687	0.20309	0.20152	0.000279955			687	0.18966	0.26892	0.26859
688	0.20309	0.20279	0.000279955			688	0.18966	0.27162	0.2697
689	0.20503	0.20406	0.000279955			689	0.18966	0.27297	0.27192
690	0.20696	0.20532	0.000279955			690	0.1931	0.27432	0.27303
691	0.20696	0.20659	0.000279955			691	0.1931	0.27568	0.27525
692	0.2089	0.20786	0.000279955			692	0.1931	0.27838	0.27636
693	0.21083	0.20913	0.000279955			693	0.19655	0.27973	0.27858
694	0.21083	0.21039	0.000279955			694	0.19655	0.28108	0.2808
695	0.21277	0.21166	0.000279955			695	0.19655	0.28378	0.28191
696	0.2147	0.21293	0.000279955			696	0.2	0.28514	0.28413
697	0.2147	0.2142	0.000279955			697	0.2	0.28649	0.28524
698	0.21663	0.21673	0.000279955			698	0.20345	0.28784	0.28746
699	0.21857	0.218	0.000279955			699	0.20345	0.29054	0.28857
700	0.2205	0.21926	0.000279955			700	0.20345	0.29189	0.29079
701	0.22244	0.22053	0.000279955			701	0.2069	0.29324	0.29301
702	0.22437	0.22307	0.000279955			702	0.2069	0.29595	0.29412
703	0.22437	0.22433	0.000279955			703	0.21034	0.2973	0.29634
704	0.22631	0.2256	0.000279955			704	0.21034	0.29865	0.29856
705	0.22824	0.22687	0.000279955			705	0.21379	0.30135	0.29967
706	0.23017	0.2294	0.000279955			706	0.21379	0.3027	0.30189
707	0.23211	0.23067	0.000279955			707	0.21724	0.30405	0.30411
708	0.23404	0.23194	0.000279955			708	0.21724	0.30676	0.30522
709	0.23598	0.23447	0.000279955			709	0.21724	0.30811	0.30744
710	0.23791	0.23574	0.000279955			710	0.22069	0.30946	0.30966
711	0.23985	0.23828	0.000279955			711	0.22069	0.31216	0.31188
712	0.24178	0.23954	0.000279955			712	0.22414	0.31486	0.31299
713	0.24178	0.24208	0.000279955			713	0.22414	0.31622	0.31521
714	0.24371	0.24335	0.000279955			714	0.22759	0.31892	0.31743
715	0.24565	0.24461	0.000279955			715	0.22759	0.32027	0.31964
716	0.24758	0.24715	0.000279955			716	0.23103	0.32297	0.32297
717	0.24952	0.24842	0.000279955			717	0.23448	0.32568	0.32519
718	0.25145	0.25095	0.000279955			718	0.23448	0.32838	0.32741
719	0.25338	0.25222	0.000279955			719	0.23793	0.33108	0.32963
720	0.25532	0.25475	0.000279955			720	0.23793	0.33378	0.33185
721	0.25725	0.25729	0.000279955			721	0.24138	0.33514	0.33518
722	0.25919	0.25856	0.000279955			722	0.24138	0.33784	0.3374
723	0.26112	0.26109	0.000279955			723	0.24483	0.34054	0.34073
724	0.26306	0.26236	0.000279955			724	0.24483	0.34459	0.34295
725	0.26499	0.26489	0.000279955			725	0.24828	0.3473	0.34628
726	0.26692	0.26616	0.000279955			726	0.24828	0.35	0.34961
727	0.26886	0.26743	0.000279955			727	0.25172	0.3527	0.35294
728	0.27079	0.26996	0.000279955			728	0.25172	0.35676	0.35516
729	0.27273	0.2725	0.000279955			729	0.25517	0.35946	0.35849
730	0.2766	0.27376	0.000279955			730	0.25862	0.36351	0.36182
731	0.2766	0.2763	0.000279955			731	0.25862	0.36622	0.36626
732	0.27853	0.27757	0.000279955			732	0.26207	0.37027	0.36959
733	0.28046	0.2801	0.000279955			733	0.26207	0.37297	0.37292
734	0.2824	0.28137	0.000279955			734	0.26552	0.37703	0.37625
735	0.28433	0.2839	0.000279955			735	0.26552	0.38108	0.38069
736	0.28627	0.28517	0.000279955			736	0.26897	0.38514	0.38402
737	0.2882	0.28771	0.000279955			737	0.26897	0.38919	0.38846
738	0.29014	0.28897	0.000279955			738	0.27241	0.39324	0.39179
739	0.29207	0.29151	0.000279955			739	0.27241	0.3973	0.39623
740	0.294	0.29278	0.000279955			740	0.27586	0.40135	0.40067
741	0.29594	0.29531	0.000279955			741	0.27586	0.40541	0.404
742	0.29787	0.29658	0.000279955			742	0.27931	0.40946	0.40844
743	0.29981	0.29911	0.000279955			743	0.27931	0.41351	0.41287
744	0.30174	0.30038	0.000279955			744	0.28276	0.41757	0.41731
745	0.30368	0.30292	0.000279955			745	0.28276	0.42162	0.42175
746	0.30561	0.30418	0.000279955			746	0.28621	0.42703	0.42619
747	0.30754	0.30672	0.000279955			747	0.28621	0.43108	0.42952
748	0.30948	0.30798	0.000279955			748	0.28966	0.43514	0.43396
749	0.31141	0.31052	0.000279955			749	0.2931	0.43919	0.4384
750	0.31335	0.31179	0.000279955			750	0.2931	0.44324	0.44284
751	0.31528	0.31432	0.000279955			751	0.2931	0.4473	0.44728
752	0.31721	0.31559	0.000279955			752	0.29655	0.45135	0.45172
753	0.31915	0.31812	0.000279955			753	0.3	0.45541	0.45505
754	0.32108	0.31939	0.000279955			754	0.3	0.45946	0.45949
755	0.32302	0.32193	0.000279955			755	0.30345	0.46486	0.46393
756	0.32495	0.32319	0.000279955			756	0.30345	0.46892	0.46837
757	0.32689	0.32573	0.000279955			757	0.3069	0.47297	0.4717
758	0.32882	0.32826	0.000279955			758	0.3069	0.47703	0.47614
759	0.33075	0.32953	0.000279955			759	0.31034	0.48108	0.47947
760	0.33462	0.33207	0.000279955			760	0.31034	0.48378	0.48391
761	0.33656	0.3346	0.000279955			761	0.31379	0.48784	0.48724
762	0.33849	0.33714	0.000279955			762	0.31724	0.49189	0.49168
763	0.34043	0.3384	0.000279955			763	0.31724	0.49595	0.49501
764	0.34236	0.34094	0.000279955			764	0.32069	0.49865	0.49834
765	0.34623	0.34347	0.000279955			765	0.32414	0.5027	0.50166
766	0.34816	0.34601	0.000279955			766	0.32414	0.50541	0.50499
767	0.3501	0.34854	0.000279955			767	0.32759	0.50946	0.50832
768	0.35397	0.35108	0.000279955			768	0.33103	0.51216	0.51165
769	0.3559	0.35361	0.000279955			769	0.33103	0.51486	0.51387
770	0.35783	0.35741	0.000279955			770	0.33448	0.51757	0.5172
771	0.3617	0.35995	0.000279955			771	0.33793	0.52027	0.52053
772	0.36364	0.36248	0.000279955			772	0.34138	0.52297	0.52275
773	0.3675	0.36502	0.000279955			773	0.34483	0.52568	0.52497
774	0.36944	0.36882	0.000279955			774	0.34483	0.52703	0.52719
775	0.37331	0.37136	0.000279955			775	0.34828	0.52973	0.52941
776	0.37718	0.37516	0.000279955			776	0.35172	0.53108	0.53163
777	0.38104	0.37896	0.000279955			777	0.35517	0.53378	0.53274
778	0.38298	0.3815	0.000279955			778	0.35862	0.53514	0.53496
779	0.38685	0.3853	0.000279955			779	0.36207	0.53649	0.53607
780	0.39072	0.3891	0.000279955			780	0.36552	0.53784	0.53718
781	0.39458	0.3929	0.000279955			781	0.36897	0.53919	0.53829
782	0.39845	0.3967	0.000279955			782	0.37241	0.54054	0.54051
783	0.40232	0.40051	0.000279955			783	0.37586	0.54054	0.54051
784	0.40619	0.40431	0.000279955			784	0.37931	0.54189	0.54162
785	0.41006	0.40811	0.000279955			785	0.38621	0.54189	0.54162
786	0.41393	0.41191	0.000279955			786	0.38966	0.54324	0.54273
787	0.41779	0.41572	0.000279955			787	0.3931	0.54324	0.54273
788	0.42166	0.42079	0.000279955			788	0.39655	0.54324	0.54273
789	0.42747	0.42459	0.000279955			789	0.4	0.54324	0.54273
790	0.43133	0.42839	0.000279955			790	0.40345	0.54324	0.54273
791	0.4352	0.43346	0.000279955			791	0.4069	0.54324	0.54273
792	0.43907	0.43726	0.000279955			792	0.41379	0.54189	0.54162
793	0.44487	0.44233	0.000279955			793	0.41724	0.54189	0.54162
794	0.44874	0.44613	0.000279955			794	0.42069	0.54054	0.54051
795	0.45261	0.4512	0.000279955			795	0.42759	0.53919	0.5394
796	0.45841	0.45501	0.000279955			796	0.43103	0.53919	0.53829
797	0.46228	0.45881	0.000279955			797	0.43448	0.53784	0.53718
798	0.46615	0.46388	0.000279955			798	0.43793	0.53649	0.53607
799	0.47195	0.46768	0.000279955			799	0.44138	0.53514	0.53496
800	0.47582	0.47275	0.000279955			800	0.44828	0.53378	0.53274
801	0.47969	0.47655	0.000279955			801	0.45172	0.53243	0.53163
802	0.48356	0.48162	0.000279955			802	0.45517	0.52973	0.52941
803	0.48936	0.48542	0.000279955			803	0.45862	0.52838	0.5283
804	0.49323	0.49049	0.000279955			804	0.46552	0.52703	0.52608
805	0.4971	0.4943	0.000279955			805	0.46897	0.52432	0.52497
806	0.50097	0.4981	0.000279955			806	0.47241	0.52297	0.52275
807	0.50484	0.5019	0.000279955			807	0.47586	0.52027	0.52053
808	0.5087	0.5057	0.000279955			808	0.47931	0.51892	0.51831
809	0.51257	0.51077	0.000279955			809	0.48621	0.51757	0.5172
810	0.51838	0.51458	0.000279955			810	0.48966	0.51486	0.51498
811	0.52224	0.51838	0.000279955			811	0.4931	0.51351	0.51276
812	0.52611	0.52218	0.000279955			812	0.49655	0.51216	0.51165
813	0.52998	0.52598	0.000279955			813	0.5	0.50946	0.50943
814	0.53191	0.52978	0.000279955			814	0.50345	0.50811	0.50832
815	0.53578	0.53232	0.000279955			815	0.5069	0.50676	0.5061
816	0.53965	0.53612	0.000279955			816	0.51034	0.50541	0.50499
817	0.54159	0.53866	0.000279955			817	0.51379	0.50405	0.50388
818	0.54545	0.54246	0.000279955			818	0.51724	0.5027	0.50166
819	0.54739	0.54499	0.000279955			819	0.52069	0.50135	0.50166
820	0.55126	0.54753	0.000279955			820	0.52414	0.50135	0.50055
821	0.55319	0.55006	0.000279955			821	0.52414	0.5	0.49945
822	0.55706	0.5526	0.000279955			822	0.52759	0.5	0.49945
823	0.55899	0.55513	0.000279955			823	0.53103	0.5	0.49834
824	0.56093	0.55767	0.00055991			824	0.53103	0.5	0.49834
825	0.56286	0.55894	0.000279955			825	0.53448	0.5	0.49834
826	0.5648	0.56147	0.000279955			826	0.53793	0.5	0.49945
827	0.56673	0.56274	0.000279955			827	0.53793	0.5	0.49945
828	0.56867	0.56527	0.000279955			828	0.54138	0.50135	0.50055
829	0.56867	0.56654	0.000279955			829	0.54138	0.5027	0.50166
830	0.5706	0.56781	0.000279955			830	0.54138	0.50405	0.50277
831	0.5706	0.56907	0.000279955			831	0.54483	0.50541	0.50388
832	0.57253	0.56907	0.00055991			832	0.54483	0.50811	0.5061
833	0.57253	0.57034	0.00055991			833	0.54483	0.50946	0.50832
834	0.57447	0.57034	0.000279955			834	0.54483	0.51216	0.51054
835	0.57447	0.57161	0.00055991			835	0.54828	0.51486	0.51387
836	0.57447	0.57161	0.000279955			836	0.54828	0.51892	0.5172
837	0.57447	0.57161	0.00055991			837	0.54828	0.52162	0.52053
838	0.57447	0.57161	0.00055991			838	0.54828	0.52568	0.52386
839	0.57447	0.57161	0.00055991			839	0.54828	0.52973	0.5283
840	0.57447	0.57161	0.00055991			840	0.54828	0.53378	0.53274
841	0.57253	0.57161	0.00055991			841	0.54828	0.53784	0.53718
842	0.57253	0.57034	0.000279955			842	0.54483	0.54324	0.54162
843	0.57253	0.57034	0.00055991			843	0.54483	0.54865	0.54717
844	0.5706	0.56907	0.00055991			844	0.54483	0.55405	0.55272
845	0.5706	0.56781	0.000279955			845	0.54483	0.55946	0.55827
846	0.56867	0.56654	0.000279955			846	0.54138	0.56622	0.56382
847	0.56673	0.56527	0.000279955			847	0.54138	0.57162	0.57048
848	0.56673	0.56401	0.00055991			848	0.54138	0.57838	0.57714
849	0.5648	0.56274	0.000279955			849	0.53793	0.58514	0.5838
850	0.56286	0.56147	0.00055991			850	0.53793	0.59324	0.59156
851	0.56093	0.5602	0.00055991			851	0.53448	0.60135	0.59933
852	0.55899	0.55894	0.000279955			852	0.53448	0.60811	0.6071
853	0.55706	0.5564	0.000279955			853	0.53103	0.61622	0.61487
854	0.55513	0.55513	0.00055991			854	0.53103	0.62432	0.62264
855	0.55319	0.5526	0.000279955			855	0.52759	0.63243	0.63152
856	0.55126	0.55133	0.000279955			856	0.52759	0.64189	0.63929
857	0.54932	0.5488	0.000279955			857	0.52414	0.65	0.64817
858	0.54739	0.54753	0.000279955			858	0.52414	0.65946	0.65705
859	0.54545	0.54626	0.000279955			859	0.52069	0.66892	0.66704
860	0.54352	0.54373	0.000279955			860	0.51724	0.67838	0.67703
861	0.54159	0.54246	0.000279955			861	0.51724	0.68784	0.6859
862	0.53965	0.54119	0.000279955			862	0.51379	0.69865	0.69589
863	0.53965	0.53866	0.000279955			863	0.51379	0.70811	0.70588
864	0.53772	0.53739	0.000279955			864	0.51379	0.71892	0.71587
865	0.53578	0.53612	0.000279955			865	0.51034	0.72838	0.72697
866	0.53385	0.53485	0.000279955			866	0.51034	0.73919	0.73807
867	0.53385	0.53359	0.000279955			867	0.5069	0.75	0.74806
868	0.53191	0.53359	0.000279955			868	0.5069	0.76081	0.75916
869	0.53191	0.53232	0.000279955			869	0.5069	0.77162	0.77026
870	0.52998	0.53232	0.000279955			870	0.5069	0.78378	0.78135
871	0.52998	0.53105	0.000279955			871	0.5069	0.79459	0.79245
872	0.52998	0.53105	0.000279955			872	0.50345	0.80541	0.80355
873	0.52998	0.53105	0.000279955			873	0.50345	0.81622	0.81465
874	0.52998	0.53105	0.000279955			874	0.5069	0.82703	0.82575
875	0.52998	0.53105	0.000279955			875	0.5069	0.83784	0.83685
876	0.52998	0.53232	0.000279955			876	0.5069	0.84865	0.84684
877	0.52998	0.53359	0.000279955			877	0.5069	0.86081	0.85905
878	0.53191	0.53485	0.000279955			878	0.5069	0.87027	0.86903
879	0.53385	0.53612	0.000279955			879	0.51034	0.88108	0.87902
880	0.53578	0.53739	0.000279955			880	0.51034	0.89054	0.88901
881	0.53772	0.53992	0.000279955			881	0.51379	0.90135	0.899
882	0.53965	0.54119	0.000279955			882	0.51379	0.91081	0.90899
883	0.54159	0.54499	0.000279955			883	0.51724	0.92027	0.91898
884	0.54352	0.54753	0.000279955			884	0.52069	0.92973	0.92786
885	0.54739	0.55006	0.000279955			885	0.52414	0.93784	0.93674
886	0.55126	0.55387	0.000279955			886	0.52759	0.94595	0.94562
887	0.55513	0.55767	0.000279955			887	0.53103	0.95405	0.95339
888	0.55899	0.56147	0.000279955			888	0.53448	0.96216	0.96004
889	0.56286	0.56527	0.000279955			889	0.53793	0.96892	0.96781
890	0.56673	0.57034	0.000279955			890	0.54483	0.97432	0.97447
891	0.57253	0.57541	0.000279955			891	0.54828	0.97973	0.98002
892	0.57834	0.58048	0.000279955			892	0.55172	0.98514	0.98446
893	0.58221	0.58555	0.000279955			893	0.55862	0.98919	0.9889
894	0.58801	0.59189	0.000279955			894	0.56552	0.99324	0.99334
895	0.59381	0.59823	0.000279955			895	0.56897	0.99595	0.99556
896	0.60155	0.60456	0.000279955			896	0.57586	0.9973	0.99778
897	0.60735	0.6109	0.000279955			897	0.58276	0.99865	0.99889
898	0.61509	0.6185	0.000279955			898	0.58966	1	1
899	0.62282	0.62484	0.000279955			899	0.59655	0.99865	0.99889
900	0.63056	0.63245	0.000279955			900	0.60345	0.9973	0.99778
901	0.6383	0.64005	0.000279955			901	0.61379	0.99459	0.99556
902	0.64603	0.64892	0.000279955			902	0.62069	0.99189	0.99223
903	0.65377	0.65653	0.000279955			903	0.62759	0.98784	0.98779
904	0.66151	0.6654	0.000279955			904	0.63793	0.98243	0.98335
905	0.67118	0.673	0.000279955			905	0.64483	0.97703	0.97669
906	0.67892	0.68188	0.00055991			906	0.65517	0.97027	0.97003
907	0.68859	0.69075	0.00055991			907	0.66207	0.96216	0.96226
908	0.69826	0.69962	0.000279955			908	0.67241	0.9527	0.95339
909	0.70793	0.70976	0.000279955			909	0.68276	0.94324	0.9434
910	0.7176	0.71863	0.00055991			910	0.68966	0.93108	0.9323
911	0.72727	0.72877	0.00055991			911	0.7	0.92027	0.92009
912	0.73694	0.73891	0.00055991			912	0.71034	0.90676	0.90677
913	0.74662	0.74778	0.000279955			913	0.72069	0.89324	0.89345
914	0.75629	0.75792	0.00055991			914	0.73103	0.87838	0.87791
915	0.76789	0.76806	0.00055991			915	0.74138	0.86351	0.86349
916	0.77756	0.7782	0.00055991			916	0.75172	0.8473	0.84795
917	0.78723	0.78961	0.00055991			917	0.76207	0.82973	0.83019
918	0.79884	0.79975	0.00055991			918	0.77241	0.81216	0.81243
919	0.81044	0.80989	0.00055991			919	0.78276	0.79324	0.79467
920	0.82012	0.82129	0.00055991			920	0.7931	0.77432	0.7758
921	0.83172	0.83143	0.00055991			921	0.8069	0.75541	0.75583
922	0.84139	0.84157	0.00055991			922	0.81724	0.73649	0.73696
923	0.85106	0.85171	0.00055991			923	0.82759	0.71622	0.71698
924	0.86267	0.86185	0.00055991			924	0.83793	0.69595	0.697
925	0.87234	0.87199	0.00055991			925	0.84828	0.67432	0.67592
926	0.88201	0.88213	0.00055991			926	0.85862	0.6527	0.65372
927	0.89362	0.89227	0.00055991			927	0.86897	0.63243	0.63263
928	0.90329	0.90114	0.00055991			928	0.87931	0.61081	0.61154
929	0.91103	0.91128	0.00055991			929	0.88966	0.58919	0.58935
930	0.9207	0.92015	0.00055991			930	0.9	0.56757	0.56826
931	0.92843	0.92902	0.00055991			931	0.9069	0.54459	0.54606
932	0.93617	0.93663	0.00055991			932	0.91724	0.52297	0.52497
933	0.94584	0.9455	0.00055991			933	0.92759	0.5027	0.50277
934	0.95358	0.95184	0.00055991			934	0.93448	0.48108	0.48169
935	0.95938	0.95944	0.00055991			935	0.94483	0.45946	0.4606
936	0.96712	0.96705	0.00055991			936	0.95172	0.43784	0.43951
937	0.97292	0.97212	0.00055991			937	0.95862	0.41757	0.41842
938	0.97872	0.97845	0.00055991			938	0.96552	0.39865	0.39956
939	0.98259	0.98352	0.00055991			939	0.97241	0.37973	0.38069
940	0.98839	0.98733	0.00055991			940	0.97931	0.36216	0.36182
941	0.99226	0.99113	0.000839866			941	0.98276	0.34324	0.34406
942	0.9942	0.99493	0.00055991			942	0.98621	0.32568	0.3263
943	0.99807	0.99747	0.00055991			943	0.98966	0.30811	0.30855
944	0.99807	0.99873	0.000839866			944	0.9931	0.29189	0.2919
945	1	1	0.000839866			945	0.99655	0.27568	0.27636
946	1	1	0.000839866			946	0.99655	0.26081	0.26082
947	0.99807	0.99873	0.000839866			947	0.99655	0.24595	0.24639
948	0.99807	0.99747	0.000839866			948	1	0.23108	0.23196
949	0.9942	0.99493	0.000839866			949	0.99655	0.21757	0.21865
950	0.99226	0.9924	0.000839866			950	0.99655	0.20541	0.20533
951	0.98646	0.98733	0.000839866			951	0.9931	0.19189	0.19312
952	0.98259	0.98226	0.000839866			952	0.98966	0.18108	0.18091
953	0.97679	0.97719	0.000839866			953	0.98276	0.16892	0.16981
954	0.96905	0.97085	0.000839866			954	0.97931	0.15946	0.15982
955	0.96132	0.96324	0.000839866			955	0.97241	0.14865	0.14983
956	0.95164	0.95437	0.000839866			956	0.96207	0.13919	0.13984
957	0.94391	0.94423	0.000839866			957	0.95517	0.12973	0.13097
958	0.9323	0.93409	0.00112			958	0.94483	0.12162	0.12209
959	0.9207	0.92395	0.00112			959	0.93448	0.11351	0.11432
960	0.90909	0.91128	0.00112			960	0.92414	0.10676	0.10766
961	0.89555	0.89861	0.00112			961	0.91034	0.1	0.09989
962	0.88201	0.88466	0.00112			962	0.89655	0.09324	0.09323
963	0.86654	0.87072	0.00112			963	0.88276	0.08649	0.08768
964	0.853	0.85551	0.00112			964	0.86552	0.08108	0.08213
965	0.83752	0.83904	0.00112			965	0.85172	0.07568	0.07658
966	0.82012	0.82256	0.00112			966	0.83448	0.07027	0.07103
967	0.80271	0.80608	0.00112			967	0.81724	0.06622	0.06659
968	0.7853	0.78834	0.000839866			968	0.8	0.06081	0.06215
969	0.76596	0.7706	0.000839866			969	0.77931	0.05676	0.05771
970	0.74662	0.75158	0.000839866			970	0.76207	0.0527	0.05438
971	0.72921	0.73257	0.000839866			971	0.74138	0.05	0.04994
972	0.70986	0.71356	0.000839866			972	0.72069	0.04595	0.04661
973	0.69052	0.69328	0.000839866			973	0.7	0.04324	0.0444
974	0.67118	0.67427	0.000839866			974	0.67931	0.04054	0.04107
975	0.6499	0.65399	0.000839866			975	0.65862	0.03784	0.03774
976	0.62863	0.63245	0.000839866			976	0.63793	0.03514	0.03552
977	0.60928	0.61343	0.000839866			977	0.61379	0.03243	0.0333
978	0.58801	0.59189	0.000839866			978	0.5931	0.02973	0.03108
979	0.56673	0.57034	0.000839866			979	0.57241	0.02838	0.02886
980	0.54739	0.55006	0.000839866			980	0.54828	0.02568	0.02664
981	0.52611	0.52978	0.000839866			981	0.52759	0.02432	0.02553
982	0.50484	0.50824	0.000839866			982	0.50345	0.02297	0.02331
983	0.48356	0.48796	0.000839866			983	0.48276	0.02162	0.0222
984	0.46422	0.46768	0.000839866			984	0.46207	0.02027	0.02109
985	0.44487	0.4474	0.00055991			985	0.44138	0.01892	0.01887
986	0.4236	0.42712	0.00055991			986	0.42069	0.01757	0.01776
987	0.40426	0.40811	0.00055991			987	0.4	0.01622	0.01665
988	0.38685	0.3891	0.00055991			988	0.37931	0.01486	0.01554
989	0.36944	0.37136	0.00055991			989	0.36207	0.01351	0.01443
990	0.3501	0.35361	0.00055991			990	0.34138	0.01351	0.01332
991	0.33462	0.33714	0.00055991			991	0.32414	0.01216	0.01332
992	0.31721	0.31939	0.00055991			992	0.3069	0.01081	0.01221
993	0.29981	0.30292	0.00055991			993	0.28966	0.01081	0.0111
994	0.28433	0.28771	0.00055991			994	0.27241	0.00946	0.00999
995	0.26886	0.2725	0.00055991			995	0.25862	0.00946	0.00999
996	0.25532	0.25729	0.000279955			996	0.24138	0.00946	0.00888
997	0.24178	0.24335	0.000279955			997	0.22759	0.00811	0.00888
998	0.22824	0.2294	0.000279955			998	0.21379	0.00811	0.00777
999	0.2147	0.21673	0.000279955			999	0.2	0.00676	0.00777
1000	0.20116	0.20406	0.000279955			1000	0.18966	0.00676	0.00666
1001	0.18956	0.19138	0.000279955			1001	0.17586	0.00676	0.00666
1002	0.17795	0.17997	0.000279955			1002	0.16552	0.00541	0.00666
1003	0.16828	0.16984	0.000279955			1003	0.15517	0.00541	0.00555
1004	0.15667	0.15843	0.000279955			1004	0.14483	0.00541	0.00555
1005	0.147	0.14956	0.000279955			1005	0.13448	0.00541	0.00555
1006	0.13733	0.13942	0.000279955			1006	0.12414	0.00541	0.00444
1007	0.12959	0.13181	0.000279955			1007	0.11724	0.00405	0.00444
1008	0.12186	0.12294	0.000279955			1008	0.11034	0.00405	0.00444
1009	0.11412	0.11534	0.000279955			1009	0.10345	0.00405	0.00444
1010	0.10638	0.10773	0.000279955			1010	0.09655	0.00405	0.00333
1011	0.10058	0.10139	0.000279955			1011	0.08966	0.00405	0.00333
1012	0.09478	0.09506	0.000279955			1012	0.08276	0.00405	0.00333
1013	0.08704	0.08872	0.000279955			1013	0.07586	0.0027	0.00333
1014	0.08124	0.08365	0.000279955			1014	0.07241	0.0027	0.00222
1015	0.07737	0.07858	0.000279955			1015	0.06552	0.0027	0.00222
1016	0.07157	0.07224	0.000279955			1016	0.06207	0.0027	0.00222
1017	0.0677	0.06844	0.000279955			1017	0.05862	0.0027	0.00222
1018	0.0619	0.06337	0.000279955			1018	0.05172	0.0027	0.00222
1019	0.05803	0.05957	0.000279955			1019	0.04828	0.0027	0.00222
1020	0.05416	0.05577	0			1020	0.04483	0.0027	0.00222
1021	0.05029	0.05196	0			1021	0.04138	0.0027	0.00222
1022	0.04836	0.04816	0			1022	0.03793	0.00135	0.00111
1023	0.04449	0.04563	0			1023	0.03448	0.00135	0.00111
1024	0.04062	0.04183	0			1024	0.03448	0.0027	0.00111
1025	0.03868	0.03929	0			1025	0.03103	0.00135	0.00111
1026	0.03675	0.03676	0			1026	0.02759	0.00135	0.00111
1027	0.03288	0.03422	0.000279955			1027	0.02759	0.00135	0.00111
1028	0.03095	0.03169	0.000279955			1028	0.02414	0.00135	0.00111
1029	0.02901	0.03042	0.000279955			1029	0.02414	0.00135	0.00111
1030	0.02708	0.02788	0.000279955			1030	0.02069	0.00135	0.00111
1031	0.02515	0.02662	0.000279955			1031	0.01724	0.00135	0.00111
1032	0.02321	0.02408	0			1032	0.01724	0.00135	0.00111
1033	0.02321	0.02281	0			1033	0.01724	0.00135	0.00111
1034	0.02128	0.02155	0			1034	0.01379	0.00135	0.00111
1035	0.01934	0.02028	0			1035	0.01379	0.00135	0.00111
1036	0.01741	0.01901	0.000279955			1036	0.01379	0.00135	0.00111
1037	0.01741	0.01774	0.000279955			1037	0.01034	0.00135	0
1038	0.01547	0.01648	0.000279955			1038	0.01034	0.00135	0.00111
1039	0.01547	0.01521	0.000279955			1039	0.01034	0.00135	0.00111
1040	0.01354	0.01394	0.000279955			1040	0.01034	0.00135	0
1041	0.01354	0.01394	0.000279955			1041	0.0069	0.00135	0
1042	0.01161	0.01267	0.000279955			1042	0.0069	0.00135	0
1043	0.01161	0.01141	0.000279955			1043	0.0069	0	0
1044	0.00967	0.01141	0.000279955			1044	0.0069	0.00135	0
1045	0.00967	0.01014	0.000279955			1045	0.0069	0	0
1046	0.00967	0.01014	0.000279955			1046	0.0069	0	0
1047	0.00774	0.00887	0.000279955			1047	0.00345	0.00135	0
1048	0.00774	0.00887	0.000279955			1048	0.00345	0	0
1049	0.00774	0.0076	0.000279955			1049	0.00345	0.00135	0
1050	0.00774	0.0076	0.000279955			1050	0.00345	0	0
1051	0.0058	0.00634	0.000279955			1051	0.00345
1052	0.0058	0.00634	0.000279955			1052	0.00345
1053	0.0058	0.00634	0.000279955			1053	0.00345
1054	0.0058	0.00507	0.000279955			1054	0.00345
1055	0.0058	0.00507	0.000279955			1055	0.00345
1056	0.00387	0.00507	0.000279955			1056	0.00345
1057	0.00387	0.00507	0.000279955			1057	0.00345
1058	0.00387	0.0038	0.000279955			1058	0
1059	0.00387	0.0038	0.000279955			1059	0
1060	0.00387	0.0038	0.000279955			1060	0
1061	0.00387	0.0038	0.000279955			1061	0
1062	0.00387	0.0038	0.000279955			1062	0
1063	0.00193	0.00253	0.000279955			1063	0
1064	0.00193	0.00253	0.000279955			1064	0
1065	0.00193	0.00253	0.000279955			1065	0
1066	0.00193	0.00253	0.000279955			1066	0
1067	0.00193	0.00253	0.000279955			1067	0
1068	0.00193	0.00253	0.000279955			1068	0
1069	0.00193	0.00127	0.000279955			1069	0
1070	0.00193	0.00253	0.000279955			1070	0
1071	0.00193	0.00253	0.000279955			1071	0
1072	0.00193	0.00127	0.000279955			1072	0
1073	0.00193	0.00127	0.000279955			1073	0
1074	0.00193	0.00127	0.000279955			1074	0
1075	0.00193	0.00127	0.000279955			1075	0
1076	0	0.00127	0.000279955			1076	0
1077	0	0.00127	0.000279955			1077	0
1078	0.00193	0.00127	0.000279955			1078	0
1079	0.00193	0.00127	0.000279955			1079	0
1080	0	0	0.000279955			1080	0
1081	0	0	0.000279955			1081	0
1082	0.00193	0.00127	0.000279955			1082	0
1083	0	0.00127	0.000279955			1083	0
1084	0	0	0.000279955			1084	0
1085	0	0	0.000279955			1085	0
1086	0	0	0.000279955			1086	0
1087	0	0	0.000279955			1087	0
1088	0	0	0.000279955			1088	0
1089	0	0	0.000279955			1089	0
1090	0	0	0.000279955			1090	0
1091	0	0	0.000279955			1091	0
1092	0	0	0.000279955			1092	0
1093	0	0	0.000279955			1093	0
1094	0	0	0.000279955			1094	0
1095	0	0	0.000279955			1095	0
1096	0	0	0.000279955			1096	0
1097	0	0	0.000279955			1097	0
1098	0	0	0.000279955			1098	0
1099	0	0	0.000279955			1099	0
1100	0	0	0.000279955			1100	0

## Sheet: Fig. 2d
		Em. (a.u.)		Em. (a.u.)		Em. (a.u.)
	Wavelength (nm)	Pdots@CTe	Wavelength (nm)	CTe		Pdots
	420	2.57913	420	0.00573	420	0.67662
	421	2.33126	421	0.00518	421	0.5947
	422	2.16904	422	0.00516	422	0.53657
	423	2.05616	423	0.00535	423	0.52731
	424	1.88203	424	0.00554	424	0.4703
	425	1.8945	425	0.00484	425	0.45672
	426	1.789	426	0.00578	426	0.44235
	427	1.72377	427	0.00541	427	0.42862
	428	1.74589	428	0.00578	428	0.38837
	429	1.67272	429	0.00559	429	0.36985
	430	1.62337	430	0.00618	430	0.36378
	431	1.50199	431	0.00631	431	0.35101
	432	1.48554	432	0.00616	432	0.34622
	433	1.49462	433	0.00633	433	0.3336
	434	1.41747	434	0.00589	434	0.31396
	435	1.38855	435	0.00526	435	0.29958
	436	1.3375	436	0.00608	436	0.2833
	437	1.26262	437	0.00603	437	0.27244
	438	1.33523	438	0.0052	438	0.24832
	439	1.29609	439	0.00512	439	0.26876
	440	1.2059	440	0.00616	440	0.24082
	441	1.25071	441	0.00548	441	0.25216
	442	1.21555	442	0.00539	442	0.24002
	443	1.18435	443	0.00582	443	0.24034
	444	1.15372	444	0.00685	444	0.21846
	445	1.08395	445	0.00635	445	0.23411
	446	1.12309	446	0.00597	446	0.19946
	447	1.04481	447	0.00642	447	0.21048
	448	1.04198	448	0.0065	448	0.18892
	449	1.00397	449	0.0074	449	0.18029
	450	0.92286	450	0.00747	450	0.17694
	451	0.94385	451	0.00749	451	0.15778
	452	0.95633	452	0.00864	452	0.15874
	453	0.89677	453	0.00944	453	0.15554
	454	0.94498	454	0.00912	454	0.15634
	455	0.94101	455	0.01089	455	0.15554
	456	0.96881	456	0.01175	456	0.17231
	457	0.9983	457	0.01487	457	0.19483
	458	1.11401	458	0.01834	458	0.20968
	459	1.21044	459	0.02024	459	0.24034
	460	1.32332	460	0.0272	460	0.29735
	461	1.53772	461	0.03176	461	0.34047
	462	1.73795	462	0.0403	462	0.41664
	463	1.94726	463	0.04763	463	0.49824
	464	2.17811	464	0.05491	464	0.55382
	465	2.30063	465	0.06614	465	0.63127
	466	2.50483	466	0.06895	466	0.70968
	467	2.60523	467	0.07702	467	0.75088
	468	2.64096	468	0.08395	468	0.74641
	469	2.58084	469	0.08626	469	0.74944
	470	2.54	470	0.08988	470	0.72756
	471	2.41351	471	0.08844	471	0.66305
	472	2.26717	472	0.09026	472	0.59949
	473	2.04425	473	0.08883	473	0.54296
	474	1.80999	474	0.08925	474	0.47237
	475	1.55361	475	0.08709	475	0.37193
	476	1.32275	476	0.08996	476	0.30422
	477	1.10153	477	0.09317	477	0.23187
	478	1.01986	478	0.09865	478	0.2068
	479	0.88826	479	0.10304	479	0.14963
	480	0.83948	480	0.11164	480	0.11274
	481	0.79694	481	0.1175	481	0.09949
	482	0.76291	482	0.13212	482	0.09917
	483	0.72037	483	0.14517	483	0.0915
	484	0.7232	484	0.16034	484	0.08001
	485	0.71866	485	0.16925	485	0.08065
	486	0.75667	486	0.18673	486	0.07697
	487	0.79467	487	0.20597	487	0.0749
	488	0.71413	488	0.22477	488	0.07266
	489	0.73455	489	0.2435	489	0.0717
	490	0.77822	490	0.26334	490	0.08144
	491	0.74022	491	0.29011	491	0.06659
	492	0.77482	492	0.31681	492	0.06212
	493	0.83154	493	0.33539	493	0.06915
	494	0.79183	494	0.36421	494	0.05717
	495	0.83041	495	0.3956	495	0.06388
	496	0.80715	496	0.42338	496	0.05973
	497	0.8945	497	0.45616	497	0.0543
	498	0.87805	498	0.48443	498	0.05877
	499	0.91662	499	0.52522	499	0.05941
	500	0.88089	500	0.56042	500	0.05158
	501	0.93534	501	0.59188	501	0.06691
	502	0.90471	502	0.63054	502	0.04998
	503	0.92173	503	0.67627	503	0.0626
	504	0.98185	504	0.71192	504	0.04791
	505	0.98526	505	0.76544	505	0.05014
	506	0.99036	506	0.81194	506	0.05366
	507	1.03404	507	0.85705	507	0.05046
	508	1.04992	508	0.90077	508	0.04599
	509	1.06467	509	0.96546	509	0.03753
	510	1.11912	510	1.01682	510	0.03433
	511	1.07714	511	1.06578	511	0.05062
	512	1.1367	512	1.12529	512	0.05701
	513	1.26376	513	1.18106	513	0.03897
	514	1.22065	514	1.25122	514	0.03897
	515	1.27737	515	1.30339	515	0.04376
	516	1.27624	516	1.37716	516	0.04024
	517	1.41747	517	1.43756	517	0.04296
	518	1.35792	518	1.4965	518	0.04759
	519	1.42088	519	1.56403	519	0.03865
	520	1.39705	520	1.64864	520	0.04008
	521	1.48724	521	1.69112	521	0.03513
	522	1.50539	522	1.75645	522	0.04104
	523	1.50426	523	1.84757	523	0.02603
	524	1.5797	524	1.88878	524	0.03178
	525	1.59672	525	1.97879	525	0.03737
	526	1.60466	526	2.03839	526	0.04455
	527	1.69881	527	2.10768	527	0.03561
	528	1.74192	528	2.1683	528	0.03354
	529	1.73625	529	2.23568	529	0.04216
	530	1.80035	530	2.32363	530	0.03657
	531	1.78843	531	2.35248	531	0.03833
	532	1.84516	532	2.4439	532	0.03338
	533	1.8548	533	2.49971	533	0.03098
	534	1.93307	534	2.54045	534	0.03705
	535	1.90642	535	2.61121	535	0.02811
	536	1.95236	536	2.66551	536	0.03146
	537	1.90244	537	2.71885	537	0.03753
	538	1.96541	538	2.77918	538	0.04296
	539	2.01702	539	2.81598	539	0.03385
	540	1.96824	540	2.88499	540	0.03258
	541	1.98583	541	2.91005	541	0.04008
	542	2.04595	542	2.97917	542	0.03561
	543	2.05786	543	2.99492	543	0.03721
	544	2.03234	544	3.04645	544	0.04663
	545	2.04935	545	3.10502	545	0.03976
	546	2.0658	546	3.12036	546	0.0428
	547	2.11912	547	3.15499	547	0.04487
	548	2.09587	548	3.19979	548	0.05046
	549	2.14011	549	3.23153	549	0.0396
	550	2.14805	550	3.26387	550	0.04631
	551	2.01192	551	3.28544	551	0.04935
	552	2.16904	552	3.29701	552	0.04264
	553	2.01305	553	3.33534	553	0.04839
	554	2.0573	554	3.32581	554	0.05014
	555	2.06977	555	3.35825	555	0.03897
	556	2.08622	556	3.38231	556	0.03912
	557	2.04085	557	3.3858	557	0.03721
	558	2.00568	558	3.40518	558	0.03673
	559	1.94499	559	3.38351	559	0.03002
	560	1.94158	560	3.38918	560	0.03769
	561	1.94215	561	3.43735	561	0.02922
	562	1.98299	562	3.42879	562	0.03226
	563	1.97902	563	3.44071	563	0.023
	564	1.88543	564	3.4023	564	0.03689
	565	1.94385	565	3.4428	565	0.03465
	566	1.8599	566	3.40244	566	0.03098
	567	1.8565	567	3.41389	567	0.0329
	568	1.81112	568	3.39251	568	0.03162
	569	1.84062	569	3.38995	569	0.02986
	570	1.85423	570	3.37773	570	0.03385
	571	1.86387	571	3.35282	571	0.03066
	572	1.75894	572	3.32669	572	0.02651
	573	1.78787	573	3.32134	573	0.03657
	574	1.71073	574	3.28524	574	0.03034
	575	1.75837	575	3.28856	575	0.02683
	576	1.67272	576	3.25263	576	0.02699
	577	1.73115	577	3.24326	577	0.0297
	578	1.6143	578	3.21762	578	0.02827
	579	1.59161	579	3.20429	579	0.02459
	580	1.62167	580	3.18449	580	0.02938
	581	1.67442	581	3.13096	581	0.01836
	582	1.60352	582	3.11782	582	0.02427
	583	1.5417	583	3.0809	583	0.02316
	584	1.53886	584	3.06939	584	0.03082
	585	1.49235	585	3.0325	585	0.0107
	586	1.52184	586	3.01033	586	0.02108
	587	1.46909	587	2.94923	587	0.01294
	588	1.44867	588	2.95244	588	0.02395
	589	1.43392	589	2.90062	589	0.02379
	590	1.41237	590	2.88566	590	0.01996
	591	1.40783	591	2.83011	591	0.02188
	592	1.37493	592	2.79458	592	0.02316
	593	1.40726	593	2.7777	593	0.02475
	594	1.31708	594	2.73494	594	0.02332
	595	1.33239	595	2.69904	595	0.01836
	596	1.26659	596	2.68292	596	0.03114
	597	1.30176	597	2.61719	597	0.02076
	598	1.25185	598	2.59313	598	0.02874
	599	1.26659	599	2.56255	599	0.02284
	600	1.27567	600	2.5009	600	0.0123
	601	1.24391	601	2.47976	601	0.01709
	602	1.2076	602	2.44236	602	0.02763
	603	1.19229	603	2.38809	603	0.023
	604	1.15315	604	2.36005	604	0.02395
	605	1.1004	605	2.32988	605	0.01373
	606	1.17754	606	2.27491	606	0.02108
	607	1.11061	607	2.24666	607	0.02619
	608	1.09019	608	2.19907	608	0.0222
	609	1.06126	609	2.18415	609	0.02092
	610	1.05843	610	2.13034	610	0.01805
	611	1.05786	611	2.08555	611	0.01549
	612	1.06296	612	2.04292	612	0.02523
	613	1.00624	613	2.01545	613	0.02252
	614	1.03744	614	1.95442	614	0.01773
	615	0.97505	615	1.93261	615	0.01437
	616	1.01191	616	1.87823	616	0.0198
	617	0.924	617	1.8426	617	0.0289
	618	0.92116	618	1.80725	618	0.02347
	619	0.94101	619	1.76373	619	0.02092
	620	0.88599	620	1.72052	620	0.01437
	621	0.88713	621	1.68763	621	0.02284
	622	0.90074	622	1.64355	622	0.02124
	623	0.88202	623	1.60407	623	0.02012
	624	0.85536	624	1.57462	624	0.01868
	625	0.82473	625	1.52365	625	0.01501
	626	0.8253	626	1.50379	626	0.0198
	627	0.77652	627	1.46057	627	0.01773
	628	0.79013	628	1.4149	628	0.02555
	629	0.77312	629	1.37955	629	0.0198
	630	0.74646	630	1.35323	630	0.01677
	631	0.7561	631	1.30804	631	0.02475
	632	0.74589	632	1.26738	632	0.01629
	633	0.70732	633	1.2441	633	0.01565
	634	0.73568	634	1.20823	634	0.02108
	635	0.73001	635	1.16963	635	0.01677
	636	0.70448	636	1.14558	636	0.0206
	637	0.68974	637	1.11245	637	0.01629
	638	0.67272	638	1.08668	638	0.01581
	639	0.68803	639	1.05322	639	0.01214
	640	0.65627	640	1.02251	640	0.01405
	641	0.64776	641	0.99465	641	0.02028
	642	0.61997	642	0.9658	642	0.01677
	643	0.61827	643	0.93999	643	0.02316
	644	0.62224	644	0.91111	644	0.01389
	645	0.61203	645	0.87967	645	0.00671
	646	0.60579	646	0.86895	646	0.01677
	647	0.60012	647	0.83946	647	0.01805
	648	0.59898	648	0.81554	648	0.01389
	649	0.55701	649	0.80514	649	0.01469
	650	0.60749	650	0.7831	650	0.01725
	651	0.58423	651	0.76923	651	0.01884
	652	0.56665	652	0.75166	652	0.01437
	653	0.57743	653	0.71991	653	0.01932
	654	0.49008	654	0.71633	654	0.01134
	655	0.55814	655	0.69971	655	0.01262
	656	0.53091	656	0.67717	656	0.01373
	657	0.53886	657	0.66243	657	0.01916
	658	0.51617	658	0.64051	658	0.02427
	659	0.56552	659	0.62915	659	0.02284
	660	0.51106	660	0.60356	660	0.01741
	661	0.52638	661	0.58807	661	0.01405
	662	0.5207	662	0.58133	662	0.01836
	663	0.52184	663	0.56941	663	0.02012
	664	0.52751	664	0.55141	664	0.02555
	665	0.50936	665	0.53087	665	0.02475
	666	0.47646	666	0.51715	666	0.01501
	667	0.4793	667	0.49549	667	0.01789
	668	0.46342	668	0.48574	668	0.01629
	669	0.49405	669	0.47534	669	0.01421
	670	0.44583	670	0.45633	670	0.00878
	671	0.45718	671	0.43573	671	0.01597
	672	0.45037	672	0.4258	672	0.01006
	673	0.45945	673	0.41309	673	0.01453
	674	0.43789	674	0.3986	674	0.00767
	675	0.44583	675	0.38976	675	0.00862
	676	0.43279	676	0.37684	676	0.01341
	677	0.40896	677	0.36117	677	0.00798
	678	0.39648	678	0.354	678	0.01262
	679	0.41804	679	0.33346	679	0.00399
	680	0.4118	680	0.33077	680	0.01613
	681	0.38117	681	0.31208	681	0.00671
	682	0.40216	682	0.30444	682	0.01373
	683	0.40556	683	0.28916	683	0.00782
	684	0.3755	684	0.287	684	0.01581
	685	0.38117	685	0.26931	685	0.01549
	686	0.38004	686	0.25874	686	0.00351
	687	0.3738	687	0.25307	687	0.01278
	688	0.36642	688	0.24425	688	0.00814
	689	0.35905	689	0.23609	689	0.01757
	690	0.3772	690	0.2246	690	0.00479
	691	0.38117	691	0.22135	691	0.00591
	692	0.34203	692	0.20883	692	0.00367
	693	0.36926	693	0.20579	693	0.00782
	694	0.346	694	0.19372	694	0.01006
	695	0.346	695	0.189	695	0.00798
	696	0.33466	696	0.18341	696	0.00782
	697	0.33693	697	0.17205	697	0.00495
	698	0.34146	698	0.16687	698	0.01006
	699	0.3409	699	0.16068	699	0.00703
	700	0.3392	700	0.15713	700	0.00862
	701	0.35508	701	0.14986	701	0.00942
	702	0.34487	702	0.1456	702	0.01198
	703	0.35678	703	0.14277	703	0.00351
	704	0.32048	704	0.13306	704	0.00415
	705	0.3443	705	0.13066	705	0.00958
	706	0.30573	706	0.12687	706	0
	707	0.33125	707	0.12247	707	0.00926
	708	0.31424	708	0.11637	708	0.00878
	709	0.3046	709	0.11222	709	0.01325
	710	0.33182	710	0.10875	710	0.01214
	711	0.29779	711	0.10584	711	0.01246
	712	0.31934	712	0.10015	712	0.01038
	713	0.32218	713	0.09702	713	0.01006
	714	0.31594	714	0.09369	714	0.01054
	715	0.35338	715	0.09086	715	0.01054
	716	0.31197	716	0.08763	716	0.00878
	717	0.31651	717	0.08358	717	0.01278
	718	0.30743	718	0.07997	718	0.01341
	719	0.30857	719	0.07678	719	0.01278
	720	0.31083	720	0.07528	720	0.00463
	721	0.3131	721	0.0725	721	0.01357
	722	0.31537	722	0.06985	722	0.0099
	723	0.32558	723	0.06651	723	0.01086
	724	0.31197	724	0.06413	724	0.00112
	725	0.28077	725	0.06171	725	0.00703
	726	0.29949	726	0.05912	726	0.01389
	727	0.3063	727	0.05684	727	0.00751
	728	0.30403	728	0.05656	728	0.01805
	729	0.29779	729	0.0517	729	0.00463
	730	0.3114	730	0.05024	730	0.0099
	731	0.29779	731	0.04815	731	0.00463
	732	0.30006	732	0.04575	732	0.01661
	733	0.3046	733	0.04515	733	0.01006
	734	0.29041	734	0.04301	734	0.01262
	735	0.30289	735	0.04237	735	0.00958
	736	0.30176	736	0.04002	736	0.01182
	737	0.29779	737	0.03832	737	0.00958
	738	0.32899	738	0.03689	738	0.00782
	739	0.29212	739	0.03501	739	0.01118
	740	0.3131	740	0.03503	740	0.01294
	741	0.30062	741	0.0333	741	0.01006
	742	0.32899	742	0.03197	742	0.0099
	743	0.28304	743	0.0293	743	0.01054
	744	0.30686	744	0.03043	744	0.00703
	745	0.33693	745	0.02724	745	0.0099
	746	0.30743	746	0.02782	746	0.00623
	747	0.3131	747	0.02609	747	0.00751
	748	0.3063	748	0.02638	748	0.00319
	749	0.30913	749	0.02358	749	0.00575
	750	0.28758	750	0.02264	750	0.00942
	751	0.31878	751	0.0226	751	0.00687
	752	0.33012	752	0.0221	752	0.01565
	753	0.31707	753	0.02268	753	0.01054
	754	0.29325	754	0.02103	754	0.01533
	755	0.27567	755	0.01979	755	0.01054
	756	0.28871	756	0.01979	756	0.00463
	757	0.30006	757	0.01804	757	0.01517
	758	0.3046	758	0.01804	758	0.01789
	759	0.31821	759	0.01813	759	0.00878
	760	0.31481	760	0.01579	760	0.00607
	761	0.31537	761	0.01596	761	0.01645
	762	0.30516	762	0.01537	762	0.01932
	763	0.346	763	0.015	763	0.01948
	764	0.31764	764	0.01434	764	0.02092
	765	0.34033	765	0.01402	765	0.02044
	766	0.34884	766	0.01389	766	0.03018
	767	0.36018	767	0.01348	767	0.0198
	768	0.36869	768	0.0137	768	0.03449
	769	0.36642	769	0.01275	769	0.03689
	770	0.35678	770	0.01254	770	0.03338
	771	0.3789	771	0.01183	771	0.02715
	772	0.38684	772	0.01156	772	0.02667
	773	0.37323	773	0.01117	773	0.03657
	774	0.37153	774	0.01104	774	0.03497
	775	0.36018	775	0.01048	775	0.03338
	776	0.34827	776	0.01049	776	0.02827
	777	0.34884	777	0.00969	777	0.03561
	778	0.34033	778	0.01012	778	0.0289
	779	0.34997	779	0.00847	779	0.02108
	780	0.33125	780	0.00864	780	0.01709
	781	0.33863	781	0.00826	781	0.02539
	782	0.32955	782	0.00858	782	0.01405
	783	0.33976	783	0.00768	783	0.02284
	784	0.35791	784	0.00728	784	0.02124
	785	0.34827	785	0.00785	785	0.02443
	850	0.01155			786	0.03178
	851	0.01308			787	0.02619
	852	0.01449			788	0.03753
	853	0.01536			789	0.04392
	854	0.01644			790	0.04823
	855	0.01849			791	0.06531
	856	0.01889			792	0.08096
	857	0.02007			793	0.09454
	858	0.02102			794	0.1343
	859	0.02323			795	0.35676
	860	0.02421			796	1
	861	0.02577			850	0.01155
	862	0.02703			851	0.01308
	863	0.02964			852	0.01449
	864	0.03095			853	0.01536
	865	0.03246			854	0.01644
	866	0.03406			855	0.01849
	867	0.03801			856	0.01889
	868	0.03879			857	0.02007
	869	0.04129			858	0.02102
	870	0.04324			859	0.02323
	871	0.04645			860	0.02421
	872	0.04925			861	0.02577
	873	0.05146			862	0.02703
	874	0.05514			863	0.02964
	875	0.05892			864	0.03095
	876	0.06195			865	0.03246
	877	0.06577			866	0.03406
	878	0.06997			867	0.03801
	879	0.07536			868	0.03879
	880	0.07944			869	0.04129
	881	0.08409			870	0.04324
	882	0.08889			871	0.04645
	883	0.09462			872	0.04925
	884	0.10052			873	0.05146
	885	0.10576			874	0.05514
	886	0.11209			875	0.05892
	887	0.11957			876	0.06195
	888	0.12603			877	0.06577
	889	0.13292			878	0.06997
	890	0.13981			879	0.07536
	891	0.14885			880	0.07944
	892	0.15694			881	0.08409
	893	0.16524			882	0.08889
	894	0.17605			883	0.09462
	895	0.1845			884	0.10052
	896	0.19423			885	0.10576
	897	0.20447			886	0.11209
	898	0.21718			887	0.11957
	899	0.22864			888	0.12603
	900	0.21264			889	0.13292
	901	0.22721			890	0.13981
	902	0.24129			891	0.14885
	903	0.25466			892	0.15694
	904	0.269			893	0.16524
	905	0.28686			894	0.17605
	906	0.30932			895	0.1845
	907	0.34679			896	0.19423
	908	0.36272			897	0.20447
	909	0.37077			898	0.21718
	910	0.38101			899	0.22864
	911	0.40057			900	0.21264
	912	0.42211			901	0.22721
	913	0.44924			902	0.24129
	914	0.47426			903	0.25466
	915	0.49946			904	0.269
	916	0.53121			905	0.28686
	917	0.55904			906	0.30932
	918	0.58755			907	0.34679
	919	0.61726			908	0.36272
	920	0.65394			909	0.37077
	921	0.68623			910	0.38101
	922	0.72092			911	0.40057
	923	0.76186			912	0.42211
	924	0.80018			913	0.44924
	925	0.8397			914	0.47426
	926	0.88204			915	0.49946
	927	0.93329			916	0.53121
	928	0.98034			917	0.55904
	929	1.0286			918	0.58755
	930	1.09025			919	0.61726
	931	1.14254			920	0.65394
	932	1.19693			921	0.68623
	933	1.25496			922	0.72092
	934	1.32763			923	0.76186
	935	1.39421			924	0.80018
	936	1.46149			925	0.8397
	937	1.5455			926	0.88204
	938	1.6194			927	0.93329
	939	1.49941			928	0.98034
	940	1.59278			929	1.0286
	941	1.67714			930	1.09025
	942	1.76527			931	1.14254
	943	1.85623			932	1.19693
	944	1.96457			933	1.25496
	945	2.06145			934	1.32763
	946	2.1586			935	1.39421
	947	2.27689			936	1.46149
	948	2.3822			937	1.5455
	949	2.49472			938	1.6194
	950	2.61855			939	1.49941
	951	2.73026			940	1.59278
	952	2.8482			941	1.67714
	953	2.96931			942	1.76527
	954	3.12231			943	1.85623
	955	3.25529			944	1.96457
	956	3.39819			945	2.06145
	957	3.57781			946	2.1586
	958	3.74075			947	2.27689
	959	3.9069			948	2.3822
	960	4.11276			949	2.49472
	961	4.30223			950	2.61855
	962	4.49731			951	2.73026
	963	4.73488			952	2.8482
	964	4.94341			953	2.96931
	965	5.16065			954	3.12231
	966	5.42071			955	3.25529
	967	5.64849			956	3.39819
	968	5.87216			957	3.57781
	969	6.10354			958	3.74075
	970	6.38058			959	3.9069
	971	6.62737			960	4.11276
	972	6.872			961	4.30223
	973	7.15792			962	4.49731
	974	7.40141			963	4.73488
	975	7.63664			964	4.94341
	976	7.92332			965	5.16065
	977	8.16169			966	5.42071
	978	8.40343			967	5.64849
	979	8.67396			968	5.87216
	980	8.88956			969	6.10354
	981	9.1117			970	6.38058
	982	9.35764			971	6.62737
	983	9.55373			972	6.872
	984	9.74138			973	7.15792
	985	9.95266			974	7.40141
	986	10.1235			975	7.63664
	987	10.2801			976	7.92332
	988	10.4507			977	8.16169
	989	10.5769			978	8.40343
	990	10.6855			979	8.67396
	991	10.8093			980	8.88956
	992	10.8937			981	9.1117
	993	10.9601			982	9.35764
	994	11.0283			983	9.55373
	995	11.0655			984	9.74138
	996	11.0916			985	9.95266
	997	11.1129			986	10.1235
	998	11.1067			987	10.2801
	999	11.0886			988	10.4507
	1000	11.0572			989	10.5769
	1001	11.0189			990	10.6855
	1002	10.9675			991	10.8093
	1003	10.8979			992	10.8937
	1004	10.8209			993	10.9601
	1005	10.7373			994	11.0283
	1006	10.6351			995	11.0655
	1007	10.5318			996	11.0916
	1008	10.4165			997	11.1129
	1009	10.2834			998	11.1067
	1010	10.1538			999	11.0886
	1011	10.0164			1000	11.0572
	1012	9.89123			1001	11.0189
	1013	9.75685			1002	10.9675
	1014	9.59666			1003	10.8979
	1015	9.45426			1004	10.8209
	1016	9.17615			1005	10.7373
	1017	9.01328			1006	10.6351
	1018	8.93635			1007	10.5318
	1019	8.84061			1008	10.4165
	1020	8.68018			1009	10.2834
	1021	8.53169			1010	10.1538
	1022	8.37919			1011	10.0164
	1023	8.20777			1012	9.89123
	1024	8.05725			1013	9.75685
	1025	7.90772			1014	9.59666
	1026	7.74097			1015	9.45426
	1027	7.59595			1016	9.17615
	1028	7.4326			1017	9.01328
	1029	7.28894			1018	8.93635
	1030	7.14815			1019	8.84061
	1031	6.99214			1020	8.68018
	1032	6.85813			1021	8.53169
	1033	6.723			1022	8.37919
	1034	6.57698			1023	8.20777
	1035	6.44844			1024	8.05725
	1036	6.32606			1025	7.90772
	1037	6.1884			1026	7.74097
	1038	6.0676			1027	7.59595
	1039	5.93495			1028	7.4326
	1040	5.8264			1029	7.28894
	1041	5.71943			1030	7.14815
	1042	5.60159			1031	6.99214
	1043	5.50144			1032	6.85813
	1044	5.3996			1033	6.723
	1045	5.29561			1034	6.57698
	1046	5.19985			1035	6.44844
	1047	5.10193			1036	6.32606
	1048	5.01722			1037	6.1884
	1049	4.93704			1038	6.0676
	1050	4.84652			1039	5.93495
	1051	4.76996			1040	5.8264
	1052	4.68365			1041	5.71943
	1053	4.61428			1042	5.60159
	1054	4.5461			1043	5.50144
	1055	4.47435			1044	5.3996
	1056	4.41282			1045	5.29561
	1057	4.35575			1046	5.19985
	1058	4.29509			1047	5.10193
	1059	4.24216			1048	5.01722
	1060	4.18987			1049	4.93704
	1061	4.14605			1050	4.84652
	1062	4.1033			1051	4.76996
	1063	4.06023			1052	4.68365
	1064	4.02382			1053	4.61428
	1065	3.98612			1054	4.5461
	1066	3.95588			1055	4.47435
	1067	3.92711			1056	4.41282
	1068	3.8998			1057	4.35575
	1069	3.87719			1058	4.29509
	1070	3.8551			1059	4.24216
	1071	3.83523			1060	4.18987
	1072	3.81862			1061	4.14605
	1073	3.80296			1062	4.1033
	1074	3.79053			1063	4.06023
	1075	3.77949			1064	4.02382
	1076	3.76839			1065	3.98612
	1077	3.76047			1066	3.95588
	1078	3.75211			1067	3.92711
	1079	3.74602			1068	3.8998
	1080	3.74262			1069	3.87719
	1081	3.73816			1070	3.8551
	1082	3.73638			1071	3.83523
	1083	3.73458			1072	3.81862
	1084	3.73321			1073	3.80296
	1085	3.73406			1074	3.79053
	1086	3.73464			1075	3.77949
	1087	3.73609			1076	3.76839
	1088	3.74018			1077	3.76047
	1089	3.74156			1078	3.75211
	1090	3.74468			1079	3.74602
	1091	3.74781			1080	3.74262
	1092	3.75312			1081	3.73816
	1093	3.75619			1082	3.73638
	1094	3.7601			1083	3.73458
	1095	3.76529			1084	3.73321
	1096	3.76872			1085	3.73406
	1097	3.77475			1086	3.73464
	1098	3.77724			1087	3.73609
	1099	3.77927			1088	3.74018
	1100	3.78432			1089	3.74156
	1101	3.78774			1090	3.74468
	1102	3.79331			1091	3.74781
	1103	3.79494			1092	3.75312
	1104	3.79741			1093	3.75619
	1105	3.799			1094	3.7601
	1106	3.80181			1095	3.76529
	1107	3.80288			1096	3.76872
	1108	3.8035			1097	3.77475
	1109	3.80324			1098	3.77724
	1110	3.80083			1099	3.77927
	1111	3.79739			1100	3.78432
	1112	3.79352			1101	3.78774
	1113	3.78707			1102	3.79331
	1114	3.77978			1103	3.79494
	1115	3.77122			1104	3.79741
	1116	3.75954			1105	3.799
	1117	3.74788			1106	3.80181
	1118	3.73113			1107	3.80288
	1119	3.71696			1108	3.8035
	1120	3.70111			1109	3.80324
	1121	3.67883			1110	3.80083
	1122	3.65956			1111	3.79739
	1123	3.63482			1112	3.79352
	1124	3.58899			1113	3.78707
	1125	3.55338			1114	3.77978
	1126	3.53958			1115	3.77122
	1127	3.51862			1116	3.75954
	1128	3.47873			1117	3.74788
	1129	3.43636			1118	3.73113
	1130	3.38141			1119	3.71696
	1131	3.325			1120	3.70111
	1132	3.2552			1121	3.67883
	1133	3.18843			1122	3.65956
	1134	3.11251			1123	3.63482
	1135	3.04171			1124	3.58899
	1136	2.95819			1125	3.55338
	1137	2.88438			1126	3.53958
	1138	2.80896			1127	3.51862
	1139	2.71852			1128	3.47873
	1140	2.63989			1129	3.43636
	1141	2.54503			1130	3.38141
	1142	2.46403			1131	3.325
	1143	2.37094			1132	3.2552
	1144	2.29421			1133	3.18843
	1145	2.20873			1134	3.11251
	1146	2.13967			1135	3.04171
	1147	2.06225			1136	2.95819
	1148	2.00282			1137	2.88438
	1149	1.94589			1138	2.80896
	1150	1.88563			1139	2.71852
	1151	1.83603			1140	2.63989
	1152	1.78602			1141	2.54503
	1153	1.74356			1142	2.46403
	1154	1.7011			1143	2.37094
	1155	1.6666			1144	2.29421
	1156	1.62946			1145	2.20873
	1157	1.59942			1146	2.13967
	1158	1.56813			1147	2.06225
	1159	1.54143			1148	2.00282
	1160	1.50971			1149	1.94589
	1161	1.48371			1150	1.88563
	1162	1.45601			1151	1.83603
	1163	1.43249			1152	1.78602
	1164	1.40645			1153	1.74356
	1165	1.38374			1154	1.7011
	1166	1.35711			1155	1.6666
	1167	1.33589			1156	1.62946
	1168	1.31549			1157	1.59942
	1169	1.29046			1158	1.56813
	1170	1.26877			1159	1.54143
	1171	1.2444			1160	1.50971
	1172	1.2242			1161	1.48371
	1173	1.20103			1162	1.45601
	1174	1.17951			1163	1.43249
	1175	1.1567			1164	1.40645
	1176	1.13655			1165	1.38374
	1177	1.11384			1166	1.35711
	1178	1.09404			1167	1.33589
	1179	1.07168			1168	1.31549
	1180	1.05224			1169	1.29046
	1181	1.02945			1170	1.26877
	1182	1.01043			1171	1.2444
	1183	0.98884			1172	1.2242
	1184	0.97102			1173	1.20103
	1185	0.95021			1174	1.17951
	1186	0.93226			1175	1.1567
	1187	0.91386			1176	1.13655
	1188	0.89543			1177	1.11384
	1189	0.87654			1178	1.09404
	1190	0.86103			1179	1.07168
	1191	0.8438			1180	1.05224
	1192	0.8291			1181	1.02945
	1193	0.81267			1182	1.01043
	1194	0.79835			1183	0.98884
	1195	0.78316			1184	0.97102
	1196	0.77042			1185	0.95021
	1197	0.75553			1186	0.93226
	1198	0.74362			1187	0.91386
	1199	0.72955			1188	0.89543
	1200	0.71888			1189	0.87654
	1201	0.70682			1190	0.86103
	1202	0.69432			1191	0.8438
	1203	0.68138			1192	0.8291
	1204	0.671			1193	0.81267
	1205	0.65932			1194	0.79835
	1206	0.648			1195	0.78316
	1207	0.63753			1196	0.77042
	1208	0.62834			1197	0.75553
	1209	0.61699			1198	0.74362
	1210	0.60606			1199	0.72955
	1211	0.59727			1200	0.71888
	1212	0.58717			1201	0.70682
	1213	0.57879			1202	0.69432
	1214	0.56869			1203	0.68138
	1215	0.56072			1204	0.671
	1216	0.5506			1205	0.65932
	1217	0.54305			1206	0.648
	1218	0.53377			1207	0.63753
	1219	0.52621			1208	0.62834
	1220	0.51908			1209	0.61699
	1221	0.51019			1210	0.60606
	1222	0.50129			1211	0.59727
	1223	0.49411			1212	0.58717
	1224	0.48693			1213	0.57879
	1225	0.47845			1214	0.56869
	1226	0.47337			1215	0.56072
	1227	0.46396			1216	0.5506
	1228	0.45802			1217	0.54305
	1229	0.45077			1218	0.53377
	1230	0.44438			1219	0.52621
	1231	0.53286			1220	0.51908
	1232	0.52813			1221	0.51019
	1233	0.52557			1222	0.50129
	1234	0.52114			1223	0.49411
	1235	0.51489			1224	0.48693
	1236	0.5087			1225	0.47845
	1237	0.50294			1226	0.47337
	1238	0.49687			1227	0.46396
	1239	0.49163			1228	0.45802
	1240	0.4856			1229	0.45077
	1241	0.48057			1230	0.44438
	1242	0.47506			1231	0.53286
	1243	0.47024			1232	0.52813
	1244	0.46455			1233	0.52557
	1245	0.45951			1234	0.52114
	1246	0.4549			1235	0.51489
	1247	0.44998			1236	0.5087
	1248	0.44571			1237	0.50294
	1249	0.44061			1238	0.49687
	1250	0.43659			1239	0.49163
	1251	0.43156			1240	0.4856
	1252	0.42745			1241	0.48057
	1253	0.42298			1242	0.47506
	1254	0.41834			1243	0.47024
	1255	0.41422			1244	0.46455
	1256	0.41002			1245	0.45951
	1257	0.40643			1246	0.4549
	1258	0.40176			1247	0.44998
	1259	0.39812			1248	0.44571
	1260	0.39384			1249	0.44061
	1261	0.38985			1250	0.43659
	1262	0.38634			1251	0.43156
	1263	0.3823			1252	0.42745
	1264	0.37874			1253	0.42298
	1265	0.37475			1254	0.41834
	1266	0.37095			1255	0.41422
	1267	0.36694			1256	0.41002
	1268	0.36305			1257	0.40643
	1269	0.35964			1258	0.40176
	1270	0.35584			1259	0.39812
	1271	0.35239			1260	0.39384
	1272	0.34853			1261	0.38985
	1273	0.34446			1262	0.38634
	1274	0.34122			1263	0.3823
	1275	0.33719			1264	0.37874
	1276	0.3336			1265	0.37475
	1277	0.32949			1266	0.37095
	1278	0.3259			1267	0.36694
	1279	0.32205			1268	0.36305
	1280	0.31803			1269	0.35964
	1281	0.31409			1270	0.35584
	1282	0.3096			1271	0.35239
	1283	0.30603			1272	0.34853
	1284	0.30168			1273	0.34446
	1285	0.29734			1274	0.34122
	1286	0.29323			1275	0.33719
	1287	0.28854			1276	0.3336
	1288	0.28446			1277	0.32949
	1289	0.28009			1278	0.3259
	1290	0.27621			1279	0.32205
	1291	0.27243			1280	0.31803
	1292	0.26897			1281	0.31409
	1293	0.26569			1282	0.3096
	1294	0.26251			1283	0.30603
	1295	0.25921			1284	0.30168
	1296	0.25624			1285	0.29734
	1297	0.25277			1286	0.29323
	1298	0.24885			1287	0.28854
	1299	0.24545			1288	0.28446
	1300	0.24124			1289	0.28009
	1301	0.23753			1290	0.27621
	1302	0.23305			1291	0.27243
	1303	0.22867			1292	0.26897
	1304	0.22469			1293	0.26569
	1305	0.22036			1294	0.26251
	1306	0.21612			1295	0.25921
	1307	0.21148			1296	0.25624
	1308	0.20678			1297	0.25277
	1309	0.2026			1298	0.24885
	1310	0.1977			1299	0.24545
	1311	0.19297			1300	0.24124
	1312	0.18894			1301	0.23753
	1313	0.18408			1302	0.23305
	1314	0.17967			1303	0.22867
	1315	0.17493			1304	0.22469
	1316	0.17025			1305	0.22036
	1317	0.16591			1306	0.21612
	1318	0.1613			1307	0.21148
	1319	0.15682			1308	0.20678
	1320	0.15271			1309	0.2026
	1321	0.14826			1310	0.1977
	1322	0.14365			1311	0.19297
	1323	0.1398			1312	0.18894
	1324	0.1352			1313	0.18408
	1325	0.13085			1314	0.17967
	1326	0.12713			1315	0.17493
	1327	0.12292			1316	0.17025
	1328	0.11908			1317	0.16591
	1329	0.115			1318	0.1613
	1330	0.11088			1319	0.15682
	1331	0.10713			1320	0.15271
	1332	0.1037			1321	0.14826
	1333	0.10007			1322	0.14365
	1334	0.09683			1323	0.1398
	1335	0.09331			1324	0.1352
	1336	0.08731			1325	0.13085
	1337	0.08408			1326	0.12713
	1338	0.08281			1327	0.12292
	1339	0.08073			1328	0.11908
	1340	0.07824			1329	0.115
	1341	0.07537			1330	0.11088
	1342	0.0724			1331	0.10713
	1343	0.0702			1332	0.1037
	1344	0.06725			1333	0.10007
	1345	0.06469			1334	0.09683
	1346	0.06259			1335	0.09331
	1347	0.06002			1336	0.08731
	1348	0.05784			1337	0.08408
	1349	0.05565			1338	0.08281
	1350	0.05325			1339	0.08073
	1351	0.05085			1340	0.07824
	1352	0.04876			1341	0.07537
	1353	0.04654			1342	0.0724
	1354	0.04439			1343	0.0702
	1355	0.04272			1344	0.06725
	1356	0.05034			1345	0.06469
	1357	0.04834			1346	0.06259
	1358	0.04654			1347	0.06002
	1359	0.0444			1348	0.05784
	1360	0.04259			1349	0.05565
	1361	0.04104			1350	0.05325
	1362	0.0395			1351	0.05085
	1363	0.03788			1352	0.04876
	1364	0.03666			1353	0.04654
	1365	0.03493			1354	0.04439
	1366	0.03318			1355	0.04272
	1367	0.03129			1356	0.05034
	1368	0.02981			1357	0.04834
	1369	0.02788			1358	0.04654
	1370	0.02609			1359	0.0444
	1371	0.02455			1360	0.04259
	1372	0.02265			1361	0.04104
	1373	0.02067			1362	0.0395
	1374	0.01893			1363	0.03788
	1375	0.01668			1364	0.03666
	1376	0.01462			1365	0.03493
	1377	0.01235			1366	0.03318
	1378	0.01083			1367	0.03129
	1379	0.00913			1368	0.02981
	1380	0.00759			1369	0.02788
	1381	0.00645			1370	0.02609
	1382	0.0054			1371	0.02455
	1383	0.00458			1372	0.02265
	1384	0.00376			1373	0.02067
	1385	0.00293			1374	0.01893
	1386	0.00249			1375	0.01668
	1387	0.00174			1376	0.01462
	1388	0.00131			1377	0.01235
	1389	0.000912165			1378	0.01083
	1390	0.000729189			1379	0.00913
	1391	0.000333625			1380	0.00759
	1392	0.000239333			1381	0.00645
	1393	-1.80919e-05			1382	0.0054
	1394	-1.8121e-05			1383	0.00458
	1395	-0.00034939			1384	0.00376
	1396	-0.000290826			1385	0.00293
	1397	-0.000450526			1386	0.00249
	1398	-0.000492198			1387	0.00174
	1399	-0.000638961			1388	0.00131
	1400	-0.000653599			1389	0.000912165
					1390	0.000729189
					1391	0.000333625
					1392	0.000239333
					1393	-1.80919e-05
					1394	-1.8121e-05
					1395	-0.00034939
					1396	-0.000290826
					1397	-0.000450526
					1398	-0.000492198
					1399	-0.000638961
					1400	-0.000653599
					1401	-0.000695868
					1402	-0.000628217
					1403	-0.000670575
					1404	-0.00074067
					1405	-0.000843243
					1406	-0.000821449
					1407	-0.000725634
					1408	-0.000810052
					1409	-0.00104
					1410	-0.000844999
					1411	-0.000967351
					1412	-0.000964331
					1413	-0.00107
					1414	-0.000888127
					1415	-0.00102
					1416	-0.00086785
					1417	-0.000977587
					1418	-0.00104
					1419	-0.000985989
					1420	-0.00104
					1421	-0.000942416
					1422	-0.00104
					1423	-0.000960361
					1424	-0.00108
					1425	-0.00114
					1426	-0.00118
					1427	-0.00108
					1428	-0.0011
					1429	-0.00109
					1430	-0.00107
					1431	-0.00118
					1432	-0.00115
					1433	-0.00112
					1434	-0.00118
					1435	-0.00125
					1436	-0.00114
					1437	-0.00107
					1438	-0.00112
					1439	-0.00109
					1440	-0.0011
					1441	-0.00116
					1442	-0.00124
					1443	-0.00136
					1444	-0.00127
					1445	-0.00125
					1446	-0.00113
					1447	-0.00133
					1448	-0.00112
					1449	-0.00119
					1450	-0.00133
					1451	-0.00124
					1452	-0.00129
					1453	-0.00119
					1454	-0.00143
					1455	-0.00127
					1456	-0.00139
					1457	-0.00131
					1458	-0.00132
					1459	-0.00124
					1460	-0.00134
					1461	-0.0014
					1462	-0.0012
					1463	-0.00136
					1464	-0.00136
					1465	-0.00129
					1466	-0.00134
					1467	-0.00135
					1468	-0.00125
					1469	-0.0013
					1470	-0.00123
					1471	-0.00135
					1472	-0.0013
					1473	-0.00148
					1474	-0.00132
					1475	-0.00127
					1476	-0.00131
					1477	-0.00129
					1478	-0.00129
					1479	-0.00135
					1480	-0.00128
					1481	-0.0013
					1482	-0.00149
					1483	-0.00131
					1484	-0.00131
					1485	-0.00149
					1486	-0.00138
					1487	-0.00141
					1488	-0.00155
					1489	-0.0015
					1490	-0.00141
					1491	-0.00148
					1492	-0.00135
					1493	-0.00134
					1494	-0.00147
					1495	-0.00135
					1496	-0.00139
					1497	-0.0014
					1498	-0.00135
					1499	-0.00121
					1500	-0.00145

## Sheet: Fig. 2e,f
		Intensity (%)		Intensity (%)		Intensity (%)		Intensity (%)
	Size (nm)	Pdots	Size (nm)	Pdots@CTe	Size (nm)	OPdots@CTe	Size (nm)	OCPdots@CTe
	1.12	0	5.615	0	1.12	0	1.12	0
	1.29	0	6.503	0	1.29	0	1.29	0
	1.5	0	7.531	0	1.5	0	1.5	0
	1.74	0	8.721	0	1.74	0	1.74	0
	2.01	0	10.1	0	2.01	0	2.01	0
	2.33	0	11.7	0	2.33	0	2.33	0
	2.7	0	13.54	0	2.7	0	2.7	0
	3.12	0	15.69	0	3.12	0	3.12	0
	3.62	0	18.17	0	3.62	0	3.62	0
	4.19	0	21.04	0	4.19	0	4.19	0
	4.85	0	24.36	2.5	4.85	0	4.85	0
	5.61	0	28.21	10	5.61	0	5.61	0
	6.5	0	32.67	18	6.5	0	6.5	0
	7.53	0	37.84	20.4	7.53	0	7.53	0
	8.72	4.24	43.82	17.5	8.72	0	8.72	0
	10.1	17.2	50.75	12.7	10.1	0	10.1	0
	11.7	28.4	58.77	8.2	11.7	0	11.7	0
	13.5	25.7	68.06	4.9	13.5	0	13.5	0
	15.7	14.9	78.82	2.8	15.7	0	15.7	0
	18.2	6.23	91.28	1.5	18.2	0	18.2	0
	21	1.93	105.7	0.8	21	0	21	0
	24.4	0.458	122.4	0.4	24.4	0	24.4	0
	28.2	0.167	141.8	0.2	28.2	3.22	28.2	0.695
	32.7	0.185	164.2	0.1	32.7	12.1	32.7	5.75
	37.8	0.205	190.1	0.1	37.8	20.2	37.8	15.3
	43.8	0.18	220.2	0	43.8	21.3	43.8	21.3
	50.7	0.132	255	0	50.7	17.1	50.7	20
	58.8	0.086	295.3	0	58.8	11.5	58.8	15
	68.1	0.0509	342	0	68.1	6.91	68.1	9.78
	78.8	0.0281	396.1	0	78.8	3.8	78.8	5.75
	91.3	0.0147	458.7	0	91.3	1.97	91.3	3.15
	106	0.00744	531.2	0	106	0.972	106	1.64
	122	0.00369	615.1	0	122	0.467	122	0.831
	142	0.00183	712.4	0	142	0.223	142	0.418
	164	0.000945	825	0	164	0.11	164	0.217
	190	0.000511	955.4	0	190	0.0555	190	0.117
	220	0.000265			220	0.0265	220	0.06
	255	0.000121			255	0.0108	255	0.027
	295	5.05e-05			295	0.00372	295	0.0108
	342	1.85e-05			342	0.000982	342	0.0037
	396	5.45e-06			396	0.000152	396	0.000965
					459	2.5e-06	459	0.000133
					531	0	531	0
					615	0	615	0
					712	0	712	0
					825	0	825	0
					955	0	955	0

## Sheet: Fig. 2g
		Zeta(mV)	Zeta(mV)
	Pdots	-21.2	-21.5	1.1225
	Pdots	-20.3
	Pdots	-23
	Pdots@CTe	-13.8	-14.9	1.09848
	Pdots@CTe	-14.5
	Pdots@CTe	-16.4
	OPdots@CTe	-17	-17.4667	0.731817
	OPdots@CTe	-18.5
	OPdots@CTe	-16.9
	OCPdots@CTe	-19.7	-18.8	0.778888
	OCPdots@CTe	-18.9
	OCPdots@CTe	-17.8
	OMV	-23.6	-23.8	0.355903
	OMV	-23.5
	OMV	-24.3
	CCM	-33.5	-32.4	0.828654
	CCM	-32.2
	CCM	-31.5

## Sheet: Fig. 3a
	OCPdots@CTe
	Time (s)	0.5 W/cm^2 6.25μg/mL	12.5μg/mL	25μg/mL	50μg/mL	100μg/mL
	0	24	25.4	22.7	25.4	23.2
	10	24.9	27	28.9	29.3	28
	20	25.9	28.4	31.1	32.1	31.5
	30	26.7	29.6	32.9	33.9	34.3
	40	27.4	30.7	34.1	35.9	36.7
	50	28	31.7	35.3	37.6	38.2
	60	28.7	32.6	36.4	39.1	39.3
	70	29.4	33.4	37.3	40.2	40.7
	80	29.7	34.2	38.3	40.8	41.9
	90	30.3	34.6	39	41.9	42.8
	100	30.6	35.5	39.9	42.9	43.8
	110	31.2	36.1	40.5	43.6	44.5
	120	31.5	36.7	41.3	44.1	45.1
	130	31.9	37.1	41.9	44.9	46.2
	140	32.4	37.6	42.5	45.5	46.7
	150	32.8	38.1	43	46.1	47.4
	160	32.9	38.5	43.3	46.3	47.9
	170	33.2	39.1	43.9	47.1	48.6
	180	33.6	39.4	44.2	47.2	48.9
	190	33.6	39.7	44.7	47.8	49.4
	200	34.2	40	45	48.3	49.8
	210	34.2	40.1	45.4	48.2	50.2
	220	34.6	40.5	45.5	48.9	50.8
	230	34.6	40.8	45.9	49	51.1
	240	34.8	40.9	46	49.4	51.6
	250	35.2	41.2	46.7	49.6	51.8
	260	35.3	41.5	46.8	50	52.2
	270	35.6	41.6	47.1	50.2	52.3
	280	35.6	41.7	47	50.1	52.7
	290	35.8	41.8	47.3	50.4	53
	300	36	42.3	47.7	51.1	53
	310	36.1	42.4	47.8	51	53.4
	320	36.1	42.5	48	51.4	53.4
	330	36.2	42.5	47.8	51.4	53.7
	340	36.5	42.7	48.1	51.8	53.9
	350	36.5	42.8	48.1	51.9	54.2
	360	36.5	43	47.7	51.6	54.3

## Sheet: Fig. 3b
	OCPdots@CTe
	Time (s)	0.1 W/cm^2 25μg/mL	0.25 W/cm^2 25μg/mL	0.5 W/cm^2 25μg/mL	0.75 W/cm^2 25μg/mL
	0	22.7	22.7	22.7	22.7
	10	25.6	26.8	28.9	30.1
	20	26.4	28	31.1	33.1
	30	27	28.5	32.9	36.9
	40	27.6	29.2	34.1	38
	50	28	30	35.3	39.8
	60	28.3	30.6	36.4	41.4
	70	28.8	31	37.3	43.1
	80	29.2	31.3	38.3	44.4
	90	29.6	31.8	39	45.5
	100	29.9	32	39.9	46.6
	110	30.1	32.6	40.5	47.8
	120	30.3	32.7	41.3	48.6
	130	30.6	33.2	41.9	49.4
	140	30.8	33.6	42.5	50.4
	150	31	33.7	43	50.9
	160	31.1	34	43.3	51.6
	170	31.4	34.2	43.9	52.1
	180	31.5	34.6	44.2	52.8
	190	31.7	34.6	44.7	53.3
	200	31.9	34.9	45	53.7
	210	32	35.2	45.4	54.2
	220	32.2	35.3	45.5	54.6
	230	32.4	35.5	45.9	55
	240	32.5	35.7	46	55.5
	250	32.6	35.7	46.7	56
	260	32.7	35.8	46.8	56
	270	32.8	36	47.1	56.4
	280	32.9	36	47	56.7
	290	33.1	36.2	47.3	57
	300	33.1	36.3	47.7	57.2
	310	33.2	36.5	47.8	57.4
	320	33.3	36.6	48	57.8
	330	33.3	36.6	47.8	57.9
	340	33.3	36.7	48.1	58
	350	33.4	36.7	48.1	58.1
	360	33	36.3	47.7	58.1

## Sheet: Fig. 3c
		0.75 W/cm^2 25ppm	0.75 W/cm^2
	Time (s)	OCPdots@CTe	dWater
	0	22.7	23.2
	10	30.1	23.1
	20	33.1	23.2
	30	36.9	23.2
	40	38	23.4
	50	39.8	23.4
	60	41.4	23.5
	70	43.1	23.5
	80	44.4	23.6
	90	45.5	23.6
	100	46.6	23.6
	110	47.8	23.6
	120	48.6	23.6
	130	49.4	23.7
	140	50.4	23.7
	150	50.9	23.7
	160	51.6	23.8
	170	52.1	23.9
	180	52.8	23.8
	190	53.3	24
	200	53.7	24
	210	54.2	24.1
	220	54.6	24
	230	55	24
	240	55.5	24.1
	250	56	24.2
	260	56	24.2
	270	56.4	24.2
	280	56.7	24.2
	290	57	24.2
	300	57.2	24.3
	310	57.4	24.4
	320	57.8	24.3
	330	57.9	24.4
	340	58	24.4
	350	58.1	24.4
	360	58.1	24.4
	370	54.2	24.4
	380	51.8	24.3
	390	49.8	24.3
	400	48.3	24.2
	410	46.7	24.2
	420	45.1	24.2
	430	44.6	24.3
	440	43.5	24.2
	450	42.6	24.2
	460	41.7	24.1
	470	40.9	24.1
	480	40.1	24.1
	490	39.4	24
	500	38.6	24.1
	510	37.9	24.1
	520	37.2	24
	530	36.8	24
	540	36.2	24
	550	35.6	23.8
	560	35.1	23.8
	570	34.7	23.8
	580	34.2	23.8
	590	33.8	23.7
	600	33.3	23.7
	610	32.9	23.7
	620	32.6	23.7
	630	32.2	23.7
	640	31.9	23.7
	650	31.5	23.6
	660	31.2	23.6
	670	30.9	23.5
	680	30.7	23.5
	690	30.3	23.5
	700	30.1	23.4
	710	29.8	23.4
	720	29.6	23.4
	730	29.4	23.4
	740	29.1	23.3
	750	28.9	23.3
	760	28.7	23.4
	770	28.5	23.3
	780	28.3	23.3
	790	28.1	23.3
	800	27.9	23.3
	810	27.8	23.3
	820	27.6	23.1
	830	27.4	23.3
	840	27.3	23.3
	850	27.1	23.3
	860	27	23.3
	870	26.9	23.3
	880	26.7	23.2
	890	26.6	23.1
	900	26.7	23.2
	910	26.5	23.2
	920	26.4	23.1
	930	26.3	23.1
	940	26.2	23.1
	950	26.1	23
	960	26	23
	970	25.9	22.9
	980	25.8	22.9

## Sheet: Fig. 3d
OCPdots@CTe
	Concentration (μg/mL)	PA Intensity
	6.25	10.32
	12.5	16.6543
	25	21.6997
	50	34.1446
	100	60.1197

## Sheet: Fig. 4c
	Concentration(μg/ml)	Cell viability (%)
		Pdots		Pdots@CTe		OPdots@CTe		OCPdots@CTe
	0	100	6.3	100	6.3	100	6.3	100	6.3
	6.25	96.4437	10.3687	112.847	11.1141	89.0983	7.00074	85.3717	1.76793
	12.5	98.8777	3.19059	79.3309	8.91585	84.5228	1.69426	78.3981	2.07948
	25	87.2134	7.15884	62.4796	9.19842	80.717	3.30003	79.3381	3.18028
	50	80.729	4.57381	43.1966	8.063	78.6715	9.89963	72.5036	7.68747
	100	78.259	4.60667	27.8201	7.87807	73.5288	12.6414	68.4245	7.91226
	4T1 orignal data at 0 H after add CCK8											4T1 orignal data at 1 H after add CCK8
Concentration(μg/ml)	Pdots	Pdots	Pdots	Pdots@CTe	Pdots@CTe	Pdots@CTe	OCPdots@CTe	OCPdots@CTe	OCPdots@CTe		Concentration(μg/ml)	Pdots	Pdots	Pdots	Pdots@CTe	Pdots@CTe	Pdots@CTe	OCPdots@CTe	OCPdots@CTe	OCPdots@CTe
0	0.2776	0.2498	0.2065	0.0414	0.0421	0.0411	0.0412	0.0429	0.0892	0.0482	0	1.74	1.6506	1.5135	0.0383	0.0378	0.0383	0.0383	0.0401	0.0822	0.0477		1.4624	1.4008	1.307	-0.0031	-0.0043	-0.0028	-0.0029	-0.0028	-0.007	-0.0005		146.24	140.08	130.7							Pdots		Pdots@CTe		OCPdots@CTe
6.25	0.2837	0.2728	0.242	0.2806	0.268	0.252	0.2408	0.2181	0.2088	0.132	6.25	1.722	1.7194	1.3788	1.9601	1.9441	1.6021	1.3958	1.433	1.3989	0.1092		1.4383	1.4466	1.1368	1.6795	1.6761	1.3501	1.155	1.2149	1.1901	-0.0228		103.475	104.072	81.7842	120.827	120.583	97.1295	83.0935	87.4029	85.6187	96.4436	10.3687	112.847	11.1141	85.3717	1.76793
12.5	0.2901	0.2618	0.2712	0.218	0.2594	0.2654	0.2299	0.2423	0.2128	0.0529	12.5	1.7264	1.614	1.6059	1.1455	1.4538	1.4516	1.2798	1.344	1.3304	0.0555		1.4363	1.3522	1.3347	0.9275	1.1944	1.1862	1.0499	1.1017	1.1176	0.0026		103.331	97.2806	96.0216	66.7266	85.9281	85.3381	75.5324	79.259	80.4029	98.8777	3.19059	79.3309	8.91585	78.3981	2.07948
25	0.2488	0.2364	0.2536	0.2335	0.2816	0.2627	0.1907	0.2245	0.2157	0.0482	25	1.542	1.3085	1.5251	0.9212	1.2442	1.2178	1.301	1.2698	1.3685	0.0475		1.2932	1.0721	1.2715	0.6877	0.9626	0.9551	1.1103	1.0453	1.1528	-0.0007		93.036	77.1295	91.4748	49.4748	69.2518	68.7122	79.8777	75.2014	82.9353	87.2134	7.15884	62.4796	9.19842	79.3381	3.18028
50	0.2228	0.214	0.216	0.2025	0.223	0.2178	0.2229	0.2241	0.2219	0.0496	50	1.4068	1.2487	1.3637	0.6481	0.9302	0.8663	1.2807	1.3304	1.0812	0.0493		1.184	1.0347	1.1477	0.4456	0.7072	0.6485	1.0578	1.1063	0.8593	-0.0003		85.1799	74.4388	82.5683	32.0576	50.8777	46.6547	76.1007	79.5899	61.8201	80.729	4.57381	43.1966	8.063	72.5036	7.68747
100	0.211	0.2043	0.2087	0.1945	0.2316	0.2269	0.2272	0.2081	0.2216	0.0474	100	1.3866	1.2674	1.2334	0.4355	0.7366	0.641	1.2112	1.2744	1.0246	0.0472		1.1756	1.0631	1.0247	0.241	0.505	0.4141	0.984	1.0663	0.803	-0.0002		84.5755	76.482	73.7194	17.3381	36.3309	29.7914	70.7914	76.7122	57.7698	78.259	4.60667	27.8201	7.87807	68.4245	7.91226
Concentration(μg/ml)	OPdots@CTe	OPdots@CTe	OPdots@CTe								Concentration(μg/ml)	OPdots@CTe	OPdots@CTe	OPdots@CTe
0	0.0389	0.0377	0.0404	0.0373	0.0375	0.037	0.047	0.0468	0.0469	0.0468	0	0.0387	0.0373	0.0369	0.0374	0.037	0.0373	0.0469	0.0467	0.0469	0.0467		-0.0002	-0.0004	-0.0035	0.0001	-0.0005	0.0003	-0.0001	-0.0001	0	-0.0001											OPdots@CTe		Control
6.25	0.2132	0.2147	0.2267	0.2235	0.1991	0.1947	0.0468	0.0469	0.0471	0.0469	6.25	1.5404	1.4685	1.3611	0.3393	0.2835	0.2547	0.0471	0.0469	0.047	0.0468		1.3272	1.2538	1.1344	0.1158	0.0844	0.06	0.0003	0	-0.0001	-0.0001		95.482	90.2014	81.6115	8.33094	6.07194	4.31655	0.0215827	0	-0.00719424	89.0983	7.00074	1.39007	0.0638941
12.5	0.2098	0.2156	0.2436	0.123	0.1588	0.1496	0.047	0.0471	0.1265	0.0461	12.5	1.4096	1.3686	1.4154	0.1465	0.1967	0.1874	0.1286	0.0735	0.1579	0.0454		1.1998	1.153	1.1718	0.0235	0.0379	0.0378	0.0816	0.0264	0.0314	-0.0007		86.3165	82.9496	84.3022	1.69065	2.72662	2.71942	5.8705	1.89928	2.25899	84.5228	1.69426	139.007	6.38941
25	0.2081	0.2144	0.2177	0.2147	0.1717	0.1735	0.0468	0.0468	0.0467	0.0467	25	1.2828	1.3393	1.384	0.197	0.1856	0.1972	0.1227	0.0475	0.0467	0.1556		1.0747	1.1249	1.1663	-0.0177	0.0139	0.0237	0.0759	0.0007	0	0.1089		77.3165	80.9281	83.9065	-1.27338	1	1.70504	5.46043	0.0503597	0	80.717	3.30003
50	0.3045	0.2173	0.2096	0.1555	0.1811	0.1625	0.0469	0.0469	0.0465	0.0515	50	1.4812	1.3865	1.1443	0.1851	0.2109	0.1995	0.0538	0.0473	0.0468	0.0475		1.1767	1.1692	0.9347	0.0296	0.0298	0.037	0.0069	0.0004	0.0003	-0.004		84.6547	84.1151	67.2446	2.1295	2.14388	2.66187	0.496403	0.028777	0.0215827	78.6715	9.89963
100	0.2312	0.2239	0.2173	0.2031	0.2062	0.1859	0.0469	0.065	0.0838	0.0559	100	1.3775	1.1217	1.1909	0.1951	0.2146	0.1978	0.0489	0.048	0.0523	0.0567		1.1463	0.8978	0.9736	-0.008	0.0084	0.0119	0.002	-0.017	-0.0315	0.0008		82.4676	64.5899	70.0432	-0.57554	0.604317	0.856115	0.143885	-1.22302	-2.26619	73.5288	12.6414

## Sheet: Fig. 4d, e
	4T1	Laser off		Laser on				HELA		4T1
	PBS	100	6.3	93.2894	1.10942		PBS	100	4.19557	99.9998	2.03334
	Pdots	87.2134	7.15884	58.9806	1.7364		PBS +	103.059	0.5804	93.2894	1.10942
	Pdots@CTe	62.4796	9.19842	54.9477	3.95308		Pdots +	58.8053	2.60654	58.9806	1.7364
	OPdots@CTe	80.717	3.30003	45.0521	0.86815		Pdots@CTe +	54.9123	4.53528	54.9477	3.95308
	OCPdots@CTe	79.3381	3.18028	37.7574	3.64148		OPdots@CTe +	47.4499	3.41917	45.0521	0.86815
							OCPdots@CTe +	58.0412	3.93467	37.7574	3.64148
	HELA PTT	Orignal data at 0 H after add CCK8											Orignal data at 1 H after add CCK8
		PBS				Pdots +				OPdots@CTe +			PBS				Pdots +				OPdots@CTe +			PBS				Pdots +				OPdots@CTe +			PBS			Pdots +			OPdots@CTe +
		0.204	0.1957	0.0468	0.0469	0.2191	0.216	0.0471	0.047	0.1856	0.1996		1.1564	1.2499	0.0467	0.0468	0.7701	0.8257	0.047	0.0469	0.615	0.6802		0.9524	1.0542	-0.0001	-0.0001	0.551	0.6097	-0.0001	-0.0001	0.4294	0.4806		0.9524	0.999233	0.0419557	0.551	0.5876	0.0260654	0.4294	0.474133	0.0341917
		0.2165	0.0468	0.0468	0.047	0.2383	0.0466	0.0468	0.0471	0.2038	0.0469		1.2076	0.0468	0.0468	0.0469	0.8404	0.0464	0.0466	0.0469	0.7162	0.0468		0.9911	0	0	-0.0001	0.6021	-0.0002	-0.0002	-0.0002	0.5124	-0.0001		1.0542	100	4.19557	0.6021	58.8053	2.60654	0.5124	47.4499	3.41917
		0.0464	0.0467	0.0468	0.0469	0.0473	0.0472	0.047	0.0471	0.0468	0.0468		0.0463	0.0466	0.0467	0.0468	0.0472	0.0471	0.0468	0.0468	0.0466	0.0466		-0.0001	-0.0001	-0.0001	-0.0001	-0.0001	-0.0001	-0.0002	-0.0003	-0.0002	-0.0002		0.9911			0.6097			0.4806
		0.0473	0.047	0.047	0.0468	0.0475	0.0471	0.0469	0.1289	0.0468	0.0466		0.0472	0.0468	0.0469	0.0467	0.0474	0.047	0.0468	0.1809	0.0467	0.0465		-0.0001	-0.0002	-0.0001	-0.0001	-0.0001	-0.0001	-0.0001	0.052	-0.0001	-0.0001		1.0269	1.0298	0.00580402	0.5513	0.5487	0.0453528	0.5244	0.579967	0.0393467
		0.1933	0.195	0.0468	0.0469	0.2773	0.1964	0.0468	0.0469	0.207	0.1945		1.2202	1.2329	0.0467	0.0468	0.8286	0.6883	0.0467	0.0467	0.7314	0.7997		1.0269	1.0379	-0.0001	-0.0001	0.5513	0.4919	-0.0001	-0.0002	0.5244	0.6052		1.0246	103.059	0.580402	0.6029	54.9123	4.53528	0.6103	58.0414	3.93467
		0.2201	0.0492	0.0465	0.0495	0.2203	0.0369	0.0466	0.0467	0.1973	0.0467		1.2447	0.0467	0.0464	0.0493	0.8232	0.0369	0.0465	0.0466	0.8076	0.0465		1.0246	-0.0025	-0.0001	-0.0002	0.6029	0	-0.0001	-0.0001	0.6103	-0.0002		1.0379			0.4919			0.6052
		PBS +				Pdots@CTe +				OCPdots@CTe +			PBS +				Pdots@CTe +				OCPdots@CTe +			PBS +				Pdots@CTe +				OCPdots@CTe +			PBS +			Pdots@CTe +			OCPdots@CTe +
	4T1 PTT
		PBS				Pdots +				OPdots@CTe +			PBS				Pdots +				OPdots@CTe +			PBS				Pdots +				OPdots@CTe +			PBS			Pdots +			OPdots@CTe +
		0.2097	0.1952	0.0463	0.0468	0.2176	0.2149	0.0469	0.0467	0.1939	0.2092		1.6011	1.6122	0.0465	0.0467	1.0584	1.0384	0.0468	0.0466	0.8125	0.8328		1.3914	1.417	0.0002	-0.0001	0.8408	0.8235	-0.0001	-0.0001	0.6186	0.6236		1.3914	1.39187	0.0203334	0.8408	0.820933	0.017364	0.6186	0.627067	0.00868153
		0.2561	0.0473	0.0465	0.0467	0.2207	0.0466	0.0467	0.0472	0.1925	0.0496		1.5837	0.0472	0.0465	0.0467	1.0192	0.0466	0.0465	0.0471	0.8315	0.0487		1.3276	-0.0001	0	0	0.7985	0	-0.0002	-0.0001	0.639	-0.0009		1.3672	99.9998	2.03334	0.7985	58.9806	1.7364	0.639	45.0521	0.868153
		0.0476	0.0471	0.0469	0.0468	0.0473	0.049	0.047	0.0485	0.0484	0.0471		0.0473	0.047	0.0468	0.0468	0.0473	0.0472	0.0469	0.048	0.0481	0.0471		-0.0003	-0.0001	-0.0001	0	0	-0.0018	-0.0001	-0.0005	-0.0003	0		1.417			0.8235			0.6236
		0.0471	0.0497	0.047	0.0469	0.0476	0.0478	0.0467	0.1308	0.0514	0.0488		0.0468	0.0495	0.0469	0.0468	0.0472	0.0477	0.0466	0.1688	0.0502	0.0478		-0.0003	-0.0002	-0.0001	-0.0001	-0.0004	-0.0001	-0.0001	0.038	-0.0012	-0.001		1.2855	1.29847	0.0110942	0.8207	0.7648	0.0395308	0.4754	0.525533	0.0364148
		0.1877	0.184	0.0471	0.0469	0.1897	0.1928	0.0469	0.0483	0.2478	0.2067		1.4732	1.4813	0.047	0.0469	1.0104	0.9303	0.0469	0.0482	0.7232	0.7471		1.2855	1.2973	-0.0001	0	0.8207	0.7375	0	-0.0001	0.4754	0.5404		1.2973	93.2894	1.10942	0.7362	54.9477	3.95308	0.5608	37.7574	3.64148
		0.2071	0.0478	0.0467	0.0468	0.2034	0.0495	0.0473	0.0643	0.2347	0.0475		1.5197	0.0473	0.0467	0.0468	0.9396	0.0486	0.0471	0.05	0.7955	0.047		1.3126	-0.0005	0	0	0.7362	-0.0009	-0.0002	-0.0143	0.5608	-0.0005		1.3126			0.7375			0.5404
		PBS +				Pdots@CTe +				OCPdots@CTe +			PBS +				Pdots@CTe +				OCPdots@CTe +			PBS +				Pdots@CTe +				OCPdots@CTe +			PBS +			Pdots@CTe +			OCPdots@CTe +

[truncated: 13 more sheets: Fig. 5b, Fig. 5c, Fig. 5d, Fig. 6b,c, Fig. 7b,c,d, Fig. 7h,i, Fig. S1, Fig. S2, Fig. S3, Fig. S5, Fig. S7, Fig. S8, Fig. S19]
